## Paracrine signals regulate human liver organoid maturation from iPSC

Akihiro Asai<sup>1\*</sup>, Eitaro Aihara<sup>2</sup>, Carey Watson<sup>3</sup>, Reena Mourya<sup>1</sup>, Tatsuki Mizuochi<sup>1,#a</sup>, Pranavkumar Shivakumar<sup>1</sup>, Kieran Phelan<sup>1</sup>, Christopher Mayhew<sup>4</sup>, Michael Helmvrath<sup>3</sup>, Takanori Takebe<sup>5</sup>, James Wells<sup>4</sup>, Jorge A. Bezerra<sup>1</sup>

<sup>1</sup>Pediatric Liver Care Center, Division of Gastroenterology, Hepatology and Nutrition, Cincinnati Children's Hospital Medical Center, Cincinnati, OH, U.S.A

<sup>2</sup>Department of Molecular and Cellular Physiology, University of Cincinnati, Cincinnati, OH, U.S.A

<sup>3</sup>Division of Pediatric Surgery, Cincinnati Children's Hospital Medical Center, Cincinnati, OH, U.S.A

<sup>4</sup>Division of Developmental Biology, Cincinnati Children's Hospital Medical Center, Cincinnati, OH, U.S.A

<sup>5</sup>Department of Regenerative Medicine, Yokohama City University, Yokohama, Kanagawa, Japan

<sup>#a</sup>Current address: Department of Pediatrics and Child Health, Kurume University School of Medicine, Kurume, Fukuoka, Japan

\* Corresponding author E-mail: akihiro.asai@cchmc.org (A.A.)

Key Words: hepatocyte differentiation; development, regeneration, tissue engineering

Abbreviations: induced Pluripotent Stem Cells (iPSC), Mesenchymal Stem Cells (MSC), Human Umbilical Vein Endothelial Cells (HUVEC), Hepatic Endoderm (HE), Alpha Fetoprotein (AFP), Alpha1 antitrypsin (A1AT), Bile Salt Export Pump (BSEP)

## Summary Statement

We studied cell interactions in a 3D liver organoid and in a 2-chamber co-culture system, and discovered that paracrine signals from MSC and HUVEC promote hepatocyte differentiation of iPSC.

## Abstract

A self-organizing organoid model provides a new approach to study the mechanism of human liver organogenesis. Previous animal models documented that simultaneous paracrine signaling and cell-to-cell surface contact regulate hepatocyte differentiation. To dissect the relative contributions of the paracrine effects, we first established a liver organoid using human induced pluripotent stem cells (iPSC), mesenchymal stem cells (MSC), and human umbilical vein endothelial cells (HUVEC) as previously reported. Time-lapse imaging showed the iPSC-derived hepatic endoderm (HE-iPSC) self-assembled into three-dimensional organoids, resulting in hepatic gene induction. Progressive differentiation was demonstrated by hepatic protein production after *in vivo* organoid transplantation. To assess the paracrine contributions, we employed a transwell system in which HE-iPSC were separately co-cultured with MSC and/or HUVEC. Although the three-dimensional structure did not form, their soluble factors induced a hepatocyte-like phenotype in HE-iPSC, resulting in the expression of bile salt export pump. In conclusion, the mesoderm-derived paracrine signals promote hepatocyte maturation in liver organoids, but organoid self-organization requires cell-to-cell surface contact. Our *in vitro* model demonstrated a novel approach to identify developmental paracrine signals regulating the differentiation of human hepatocytes.

## Introduction

The ability to produce differentiated functional hepatocytes from human induced pluripotent stem cells (iPSC) presents a major opportunity to directly study mechanisms of human liver disease, to perform high-throughput drug screening for new therapies, and to facilitate hepatocyte transplantation (Baxter et al., 2010; Colman and Dreesen, 2009; Forbes et al., 2015; Haridass et al., 2008; Yi et al., 2012). Functional hepatocytes derived from iPSC are in a relatively immature state, with a gene expression pattern similar to that of the embryonic liver (Si-Tayeb et al., 2010). Recent embryologic studies have discovered the critical roles of the surrounding mesenchymal and endothelial cells in the formation of the liver primordium from the endoderm. These mesodermal cells govern the specification of liver progenitors and control their fate by creating an embryonic niche that promotes liver development. Recapitulating this embryonic niche is a novel approach to guide hepatic differentiation and liver organoid morphogenesis from iPSCs (Takebe et al., 2013).

iPSCs cultured in the presence of human umbilical vein endothelial cells (HUVEC) and mesenchymal stem cells (MSC, from human bone marrow) form a three-dimensional (3D) liver organoid that enables further hepatic differentiation (Takebe et al., 2013). Direct cell-cell contact of MSC with the other cells appears to be required to induce liver organoid morphogenesis (Takebe et al., 2015). However, the contact-dependent or paracrine factors regulating hepatic differentiation remain unknown. Therefore, we hypothesized that soluble factors independent of cell-cell contact regulate hepatic differentiation of iPSC. To test this hypothesis, we first documented the transcriptional profile of the organoid and individual cell types, and molecularly defined the different stages of organoid development. Then, we created a 2-chamber culture system which prevents iPSC contact with HUVEC and MSC while maintaining exposure to their soluble factors. We found that organoid morphogenesis required direct cell-cell contact. Further, we found that iPSC cultured in the presence of, but without contact with, HUVEC or MSC manifest the epithelial phenotype of hepatocyte differentiation, including high levels of albumin secretion, canalicular proteins, tight junctions, and other functional markers.

## Results

### **iPSC directly interact with HUVEC and MSC during liver organoid formation**

We first investigated morphogenesis of the liver organoid and focused on the behavior of HUVEC. To examine positional relationships of hepatic specified endoderm iPSC (HE-iPSC) to HUVEC and the morphological dynamics of organoid formation, we precisely mapped the spatial distribution of HE-iPSCs and HUVEC by whole mount staining with antibodies against alpha fetoprotein (AFP, hepatoblast marker) and CD31 (HUVEC marker) followed by fluorescent confocal microscope imaging. We depicted cellular distribution at 6 hours, 24h, 48h, day-4, and day-6 after starting co-culture (Fig. 1A). At 6 hours of co-culture, AFP+ and CD31+ cells began to self-cluster individually while forming a disc-like structure (Fig. S1). At 24h, confocal image analysis revealed spatial proximity of AFP+ cells to HUVEC at the inner surface of the organoid disc margin, where HUVEC tubular structures extended into an AFP+ band-like layer (Fig. 1B). At 48h, the AFP+ cells formed small clusters in a HUVEC web-like structure in addition to a circular band-like layer at the periphery of the organoid (Fig. 1C). At day-4 and -6, as the organoid condensed in size, the HUVEC network extended. These observations suggested that the HE-iPSC and HUVEC maintain spatial proximity during dynamic liver organoid morphogenesis, raising the possibility that they may exert paracrine effects.

To quantify the extent of hepatic differentiation induced by cell-cell interaction during liver organoid formation, we measured changes in the organoid transcriptome at time points corresponding to the self-organization and condensation of the organoid (day-2, -4, -6; n=3 each). We determined gene expression profiles by RNA-seq compared with additional samples obtained from human liver tissue and primary cultured human hepatocyte. First, to select liver related genes, we determined 3146 genes enriched in the primary hepatocytes ( $\geq 2$ -fold). Next, an analysis of the most significantly altered group of genes in the liver organoids (expression levels  $\geq 2$ -fold) showed enrichment of 442 genes in day-2 liver organoid (LO-D2). Applying hierarchical clustering and phylogenetic tree analysis, the day-2 organoids clustered into one subgroup and day-4 and day-6 into another, with distinct patterns of Differentially Expressed Genes (DEGs) between the two subgroups (Fig. 2 i). Gene expression profiles of LO-D2 were similar to that found in primary cultured human

hepatocytes. Notably, although a substantial number of gene transcripts maintained a similar level of expression in LO-D4 and LO-D6, the lower expression of some genes suggests that prolonged culture of liver organoids in the current culture conditions may not be suitable for maintenance of hepatocyte differentiation.

To further examine whether these genes were induced *de novo* by cell-cell interaction during organoid formation, we compared the day-2 gene expression profiles to that found in individual cells cultured alone (Fig. 2 ii). We found that most of the genes are not expressed before co-culture, indicating that co-culturing different cell types induced new genes that are important for hepatocyte differentiation. Collectively, these results indicate that spatial proximity of HE-iPSC to HUVEC (and MSC) at complex interfaces correlates with the peak expression of genes important for hepatic differentiation during the first 48 hours of organoid morphogenesis, suggesting a critical role for cell-cell interaction during liver organoid development.

To determine whether liver organoids are capable of functioning as mature liver tissue, organoids at day-2 culture were implanted under the kidney capsule of immunodeficient mice. Three weeks after implantation, serum levels of human albumin (increasing up to 284 ng ml<sup>-1</sup> at 8 weeks) and alpha1 antitrypsin (A1AT) (increasing up to 206 ng ml<sup>-1</sup> at 8 weeks) were detected, further suggesting hepatic maturation of the liver organoid *in vivo* (Fig. S2). The albumin concentration was lower than that found in human serum, which contains albumin at 4 x10<sup>7</sup> ng ml<sup>-1</sup> (4g dl<sup>-1</sup>), but the concentration of human A1AT was closer to that of the human serum (2000 ng ml<sup>-1</sup>). Neither human albumin nor A1AT were detected in the serum of mice which were implanted with human MSC under the kidney capsule.

### **Direct surface contact of stem cells is required for 3D formation of liver organoids**

Based on the finding that spatial proximity of HE-iPSC with HUVEC correlates with hepatic differentiation of the organoid, we examined whether direct surface contact is required for liver organoid morphogenesis by applying a 2-chamber culture system for multicellular co-culture. In this 2-chamber culture system, the cellular surface contact was prohibited by a permeable membrane interposed between HE-iPSC and

HUVEC and/or MSC. In the 2-story well, HE-iPSC were cultured on the Matrigel coated, micro-pored membrane in the upper chamber and HUVEC and/or MSC were cultured in the lower chamber in the same culture medium used for the liver organoid culture (Fig. 3A). When cultured with HUVEC and/or MSC, the HE-iPSC in the upper chamber did not undergo induced 3D morphogenesis; instead, they formed a monolayer on the membrane. This indicates that surface contact of HE-iPSC with non-parenchymal cells (HUVEC and MSC) is required for organoid morphogenesis.

To quantify hepatic differentiation of the HE-iPSC monolayer, we serially monitored the albumin concentration in the culture supernatant by ELISA in various 2-chamber co-culture combinations (Fig. 3B. n=8 at each time point and co-culture condition). At day-12 of culture, HE-iPSC/MSC produced albumin at a rate of  $2,438 \pm 241$  ng ml<sup>-1</sup> per 24h and HE-iPSC/HUVEC produced albumin at a rate of  $2,275 \pm 238$  ng ml<sup>-1</sup> per 24h; this is a 25-fold and 24-fold increase in albumin production over that of HE-iPSC without co-culture ( $95.8 \pm 32.7$  ng ml<sup>-1</sup> per 24h), respectively (p<0.001). This indicates that paracrine signals produced by HUVEC or MSC induced hepatic differentiation of HE-iPSC. Contrary to our expectation, when co-cultured with MSC and HUVEC together in the lower chamber, HE-iPSC produced albumin at a lower rate than HE-iPSC/MSC or HE-iPSC/HUVEC ( $741 \pm 122$ ,  $757 \pm 247$ ,  $665 \pm 169$  ng ml<sup>-1</sup> per 24h at day-8, 10, 12, all with p<0.001). To confirm the source of albumin, we measured mRNA expression of *ALB* in MSC, HUVEC, and MSC+HUVEC, which were co-cultured with HE-iPSC for 12 days. *ALB* mRNA was not detected in MSC, HUVEC, or MSC+HUVEC (Fig.S3). We also quantified A1AT production in the same set of culture supernatants and found a production pattern similar to that of albumin. Neither albumin nor A1AT were produced by HUVEC or MSC when cultured by themselves in the same culture medium. In each co-culture condition, viable cell numbers of HE-iPSC were comparable at day-8 and -12. These results indicate that paracrine signals produced by MSC or HUVEC induce hepatic differentiation of HE-iPSC. In addition, the different albumin and A1AT production rates under differing culture conditions (MSC alone or HUVEC alone vs. MSC+HUVEC) suggested that the co-culturing interaction of MSC and HUVEC in the lower chamber altered the differentiation of HE-iPSC.

Because of the noted difference in albumin and A1AT production in the co-culture of HE-iPSC with both MSC and HUVEC in the lower chamber (HE-iPSC/MS+HUVEC: triple-culture), we monitored morphological changes in the lower chamber during the mix-culture of MSC and HUVEC, compared to MSC alone or HUVEC alone in the lower chamber (Fig. S4). When cultured together, MSC and HUVEC formed cell clusters and showed distinct cellular morphology by day-4. Viable cell numbers of co-cultured MSC and HUVEC in the lower chamber were comparable when compared to MSC alone or HUVEC alone, indicating that co-culture did not compromise cell survival. These results raised the possibility that the cell-cell interaction of MSC-HUVEC triggered changes in production of paracrine soluble factors, which may lead to modified differentiation of HE-iPSC.

### **The morphology, gene expression and function of the HE-iPSC monolayer**

The HE-iPSC in the upper chamber exhibited a polygonal cellular morphology with occasional diploidic nuclei, resembling mature hepatocytes (Fig. 4A). When cultured without cells in the lower chamber, HE-iPSC exhibited a cellular morphology similar to immature endoderm cells, unlike epithelial cells (Fig. S5). Further, we characterized expression pattern of hepatic proteins in HE-iPSC to examine whether the polygonal monolayer cells differentiated to hepatocytes. Immunohistochemical staining with hematoxylin counter staining revealed that the large polygonal cells expressed albumin, A1AT, and a hepatic functional marker, CPS1 (Carbamoyl-Phosphate Synthase 1) (Fig. 4A). The cholangiocyte markers, CK7 and CK19, were not expressed.

To investigate the protein expression pattern of the monolayer cells in the upper chamber induced from HE-iPSC, we double-stained the monolayer with antibodies against albumin and A1AT and found double and single expressing cells (Fig. S6). Double staining with A1AT and CPS1 showed similar expression patterns. These co-expression/single-expression patterns of hepatic proteins resemble the pattern seen in mature hepatocytes in liver tissue.

Next, we measured expression levels of liver specific genes in the hepatocyte-like cells at day-8 (Fig. 4B, n=4 of each combination of 2-chamber culture). In addition to *ALB* and *SERPINA1* (coding A1AT), *TTR* (Transthyretin), *HNF4a* (Hepatic Nuclear Factor 4a), *PYGL* (Phosphorylase, Glycogen, Liver: enzyme involved in glycogen metabolism), *CPS1*, and *CP* (Ceruloplasmin) were quantified. Most of the genes were up-regulated after 8 days of the 2-chamber co-culture compared to the culture of HE-iPSC only. When compared to primary hepatocytes in order to measure the degree of hepatic differentiation, the hepatocyte-like cells (with MSC or HUVEC) expressed more *SERPINA1*, *TTR*, *HNF4a*, and *PYGL*, however less *ALB*, *CSP2*, and *CP*. When compared among co-culture combinations, there were significant variations in each gene expression level. The HE-iPSC/HUVEC and HE-iPSC/MSC cultures showed higher expression levels of most genes than that found in the HE-iPSC/MSC+HUVEC culture. Collectively, our results demonstrated that paracrine signals produced by MSC or HUVEC are sufficient to induce hepatic differentiation of HE-iPSC, yet some liver genes were not fully up-regulated.

To further examine hepatic function, we measured urea production and glycogen accumulation of the hepatocyte-like cells (Fig. S7). After 8 days of co-culture with HUVEC and/or MSC in the 2-chamber, the culture supernatants of 48-hours' incubation from hepatocyte-like cells were collected and their urea concentrations were measured. The hepatocyte-like cells released urea into their culture supernatant, at similar levels among co-culture combinations, while little urea was produced by HE-iPSC only. Glycogen accumulation in the cytoplasm was demonstrated by PAS staining of the hepatocyte-like cells after 8 days of co-culture with HUVEC in the lower chamber. A similar staining pattern was seen in hepatocyte-like cells in the co-culture of MSC, HUVEC and MSC+HUVEC.

### **Cellular polarity and bile acid transport of hepatocyte-like cells**

To demonstrate other functional features of hepatocyte-like cells, we investigated their polarity by transmission electron microscopy (Fig. 5A). The hepatocyte-like cells exhibited microvilli on the surface opposite the monolayer. Each cell was connected to adjacent cells with a desmosome-like structure (Fig. 5B), suggesting formation of tight junctions. This was confirmed by immunostaining of the tight junction protein,



ZO-1 (Fig. 5C), with signals on the polygonal border of every hepatocyte-like cell. Z-stack analysis of 3D-reconstructed confocal images revealed focal localization of ZO-1 on the lateral membrane, consistent with the tight junction pattern of typical epithelial tissues. In keeping with polarization, the albumin concentration in the lower chamber was 3~5 fold higher than the upper chamber when co-cultured with MSC or HUVEC (Fig. 5E,  $p < 0.001$ ).

We also found that the bile salt export pump (BSEP) was expressed in monolayer cells (Fig. 5E). To determine precise cellular location of BSEP, we performed immunofluorescent confocal microscopy imaging and determined that BSEP was localized on the apical and lateral membranes. On the apical membrane at the level of ZO-1 positive tight junctions, BSEP was visualized in a fine granular pattern, suggesting that BSEP is expressed on the microvilli, which is seen in the electron microscope images. We further measured the gene expression of *ABCB11* (encoding BSEP) in hepatocyte-like cells in co-culture with MSC and/or HUVEC compared to HE-iPSC only (Fig. S8A). The hepatocyte-like cells with MSC and/or HUVEC expressed more *ABCB11* than cells from HE-iPSC only. In the HE-iPSC only culture, rare cells expressed BSEP, as shown by immunofluorescent staining (Fig. S8B).

Further, we tested the ability of the hepatocyte-like cells to transport bile acids from the basolateral membrane (lower chamber) to the apical membrane (upper chamber). First, by quantifying trans-epithelial electrical resistance (TEER), we demonstrated an epithelial barrier function of the hepatocyte-like cells. In all co-culture conditions, the TEER was  $>400\text{m}\Omega\text{ cm}^2$ ; HE-iPSC cultured alone had no significant TEER. Second, we measured the uptake of fluorescent labelled bile acid, Cholyglycylamidofluorescein (CGamF), into the intracellular compartment. After 60 minutes of CGamF incubation, cells were lysed by NaOH and fluorescent intensities of the lysates were quantified. Hepatocyte-like cells co-cultured with HUVEC showed comparable bile acid uptake to primary adult mouse hepatocytes (Fig. 5F) and significantly higher than that of cells in the HE-iPSC only. To test bile acid transport, we measured the concentration of CGamF in the upper chamber when it was initially loaded in the lower chamber and compared it to the bile acid concentration

measured in the lower chamber when loaded in the upper (Fig. 5G). The hepatocyte-like cells co-cultured with HUVEC showed significantly higher ability to transport bile acid (208.7 +/- 29.4 pmol per cellular protein in mg), compared to the reverse (21.7 +/- 5.6 pmol per cellular protein in mg). The hepatocyte-like cells co-cultured with MSC and MSC+HUVEC showed comparable results. These results demonstrated directional (basolateral to apical) bile acid transport in the hepatocyte-like cells.

These results indicate that soluble factors from MSC and HUVEC are sufficient to induce hepatic differentiation of HE-iPSC with a potential canalicular function.

### **Protein analysis of MSC, HUVEC and MSC+HUVEC co-culture in the 2-chamber system**

To characterize growth factors and differentiation signals produced by MSC and HUVEC, we performed a high throughput proteomic analysis of the culture supernatant. The supernatants from each co-culture combination (HE-iPSC/MSC, HE-iPSC/HUVEC, HE-iPSC/MSC+HUVEC, HE-iPSC only) were collected and subjected to a SOMAscan assay, which captures specific proteins by pre-designed aptamers. The assay quantified 1,180 proteins simultaneously in each supernatant; 228 proteins which changed by  $\geq 3$  fold above the levels seen in HE-iPSC only were selected for further analysis (Fig.6). Detailed results of the SOMAscan are listed in Table S5 and S6. A heat map was generated to color-scale each protein expression using the Z-scores of each protein expression compared among HE-iPSC/MSC, HE-iPSC/HUVEC, and HE-iPSC/MSC+HUVEC. A cluster analysis of the 228 proteins identified two main groups of proteins (Table S7). The first group or cluster A contained 44 proteins up-regulated in the both lower chambers when HE-iPSC were cultured with MSC or HUVEC, whereas cluster B represents 50 proteins up-regulated in co-culture of MSC+HUVEC in the lower chamber. Results of enrichment analysis of each cluster are listed in the tables in Fig.6 (a full result in Table S8). In cluster A, the enrichment analysis of proteins that increased in both HE-iPSC/MSC and HE-iPSC/HUVEC revealed higher expression of proteins that are typically expressed in the late stage of liver development. Paracrine factors, who potentially play roles in hepatic differentiation were identified, including Angiotensinogen (ANG),  $\alpha$ -2 macroglobulin (A2M) and Plasminogen (PLG). In cluster B, we found that the co-

culture of MSC+HUVEC induced a signature in which proteins related to TGF $\beta$  and hypoxic response were the most abundantly expressed, indicating that direct cell-cell contact of MSC and HUVEC induced a distinct secretome signature in the 2-chamber culture environment.

## Discussion

Our finding that HE-iPSC differentiate into large polygonal cells with hepatic marker expression and hepatocyte specific functions provides evidence that paracrine soluble factors secreted by MSC or HUVEC, without cell-cell surface contact, is sufficient to induce hepatic differentiation. We also demonstrated that co-culture of HE-iPSC, MSC and HUVEC induced liver organoid formation and hepatic differentiation simultaneously, with further hepatic maturation after implanting *in vivo*. In addition to the finding that direct cell-cell surface contact is necessary for 3D liver organoid morphogenesis, our results indicate that paracrine signals from MSC or HUVEC are able to promote hepatocyte differentiation independently, but both must co-exist to allow for the cell-cell contact and organization into a 3D liver organoid.

It is important to carefully determine the extent of hepatic differentiation during development of methods to induce “hepatocytes” from iPSC since the degree of induction varies widely - from fully functional hepatocytes to hepatocyte-like cells with limited hepatic function (Schwartz et al., 2014). To develop an *in vitro* system that allows for further functional differentiation of hepatocytes from iPSC, we used human hepatocytes in primary culture to determine the relative extent of hepatic maturation in our liver organoids and induced hepatocyte-like cells. When both cell-cell surface contact and paracrine signals were engaged, the liver organoids showed an expression profile of hepatocyte-enriched genes similar to that of primary hepatocytes, as previously reported (Takebe et al., 2013). When cell-cell surface contact was prevented, the paracrine signals alone could induce hepatic differentiation in HE-iPSC, as evident by the changes in the gene expression profiles for albumin and A1AT1.

When cultured with MSC or HUVEC, several hepatic marker genes were highly expressed in the hepatocyte-like cells. Although the mRNA levels were lower than that detected in primary hepatocytes, the degree of albumin production of the hepatocyte-like cells in our 2-chamber system was ~2.5-fold higher than that previously reported in hepatocyte-like cells induced from iPSC by Si-Tayeb *et al* (Si-Tayeb *et al.*, 2010). Their method, which consists of the addition of several growth factors in a stepwise fashion into the culture medium, achieved ~1,500 ng ml<sup>-1</sup> of albumin in the supernatant of the 3-day culture. When cultured for 3 days (from day-7 to day-10), our 2-chamber culture of HE-iPSC/MS and iPSC/HUVEC produced albumin concentrations of 4,300 ±130 and 4,400±300 ng ml<sup>-1</sup> as measured in the culture supernatant respectively. Additionally, CPS1, a liver specific enzyme of the urea cycle which is exclusively expressed in mature hepatocytes (Butler *et al.*, 2008), is expressed in our hepatocyte-like cells. We also quantified their function by measuring urea production. Furthermore, we observed morphological features of cellular polarity and tight junctions in the monolayer hepatocyte-like cells. Collectively, the protein expression pattern of hepatic markers and morphological features provide evidence for additional maturation of hepatocyte-like cells. However, the low expression levels of a few functional genes suggest that the hepatocyte-like cells are less mature than the liver organoids *in vivo*.

Prior studies support the concept that soluble factors from mesenchymal and endothelial cells induce hepatic differentiation of fetal hepatic progenitors (Tsuruya *et al.*, 2015). Among the paracrine soluble factors known to induce hepatic differentiation is Hepatic Growth Factor (HGF), which is produced by MSC and HUVEC (Ehashi *et al.*, 2007; Kamiya *et al.*, 2001; Kamiya *et al.*, 2002). Our proteomic analysis found increased expression of HGF in the media from MSC, HUVEC and MSC+HUVEC, suggesting that it may serve to induce hepatocyte differentiation of HE-iPSC. Other growth factors, which are related to late stage liver development, are also found in the secretome of their supernatant, indicating that these paracrine factors from MSC or HUVEC promote hepatic differentiation in the 2-chamber culture. Angiotensinogen (ANG),  $\alpha$ -2 macroglobulin (A2M) and Plasminogen (PLG), which have been associated with hepatocyte differentiation (or

regeneration) in previous studies, are also increased in these cells (Clotman et al., 2005; Gelly et al., 1991; Shanmukhappa et al., 2009; Tiggelman et al., 1997). Future investigations will directly uncover whether these or other molecules produced by the MSC and/or HUVEC are mechanistically linked to hepatocyte differentiation. Notably, when MSC and HUVEC are co-cultured together, they specifically expressed a protein signature of hypoxic responses, including TGF $\beta$  related factors (TGFBI, INHBA). TGF $\beta$  stimulation of human hepatocytes has been reported to reduce albumin production (Busso et al., 1990) and to interfere with hepatocyte maturation (Clotman and Lemaigre, 2006; Touboul et al., 2016). Based on this finding, it is possible that hypoxia response-proteins may play a role in decreasing albumin production and interfering with hepatic maturation of HE-iPSC when MSC and HUVEC are co-cultured in the lower chamber. Further investigation will determine whether these hypoxic response pathways play a regulatory role in cell maturation in co-culture of HE-iPSC, MSC, and HUVEC as well as in liver organoids.

Bile acid transporters, especially BSEP, have not been up-regulated in hepatocyte-like cells induced in vitro from iPSC in prior studies (Schwartz et al., 2014). Our findings that the co-culture in the 2-chamber system promoted the differentiation of cells with BSEP expression along with their ability to uptake and transport bile acids add important biological features to our system. With these functional properties, the system can be used to study mechanisms of diseases due to canalicular dysfunction, as well as for drug screening. However, the full extent of differentiation remains unclear, as we have not yet tested the complete functional repertoire of the hepatocyte canalculus, which is key for appropriate drug metabolism and bile acid synthesis. If needed, further improvement in the co-culture system, perhaps by the use of matrix sandwich or changes in oxygenation, could foster further cellular maturation (Deharde et al., 2016; Noel et al., 2013; Xiao et al., 2014).

The 2-chamber culture system described here is a simplified system that may be particularly useful for studies of drug metabolism and may be used to model human diseases at the cellular level. Using iPSC, Takayama *et al* reported the use of drug metabolism assays in induced hepatocyte-like cells (Takayama et al., 2014). Our study supports the potential for human hepatocyte-like cells to be used in drug

screening and toxicological assays. Examples include the use of the 2-chamber culture system to dynamically measure bile acid transport between chambers, thus enabling pharmacokinetic studies of the bile acid transporters (Araki et al., 2005; Ghatak et al., 2015; Mita et al., 2006). Based on the comparable functional profiles exhibited by HE-iPSC with MSC or HUVEC (examples: secretion of albumin and alpha-1-antitrypsin and bile acid uptake/transport), both experimental conditions may be similarly useful for drug screening. When taking into account the higher expression of *HNF4a* and *PYGL* mRNA in the HE-iPSC/HUVEC combination, one might argue this particular cell co-culture system fosters better maturation and may be preferable.

In summary, by dissecting the mechanism of organoid formation, our study shows that paracrine signals produced by MSC or HUVEC promote hepatic differentiation in HE-iPSC without direct surface contact of cells. Our demonstration that the induced hepatocyte-like cells show epithelial polarity and tight junctions provides a foundation for experimental studies, including drug screening and bile acid transport assays. Using the methodology, it will be possible to design personalized studies using patient-derived iPSC for therapeutic drug screening for liver diseases and for toxicology experiments.

## **Materials and Methods**

### **Human livers and primary cultured human hepatocytes**

The study protocol conformed to the ethical guidelines of the 1975 Declaration of Helsinki and was approved by the Institutional Review Board of Cincinnati Children's Hospital Medical Center. Human primary hepatocytes were purchased from GIBCO® Fresh Hepatocytes service (Thermo). After shipment on ice, plated hepatocytes were incubated at 37°C in a humidified 5% CO<sub>2</sub> environment in Williams Medium E (Thermo) supplemented with Primary Hepatocyte Thawing and Plating Supplements (Thermo) for 48 hours before being subjected to RNA extraction.

### **Generation of Liver organoid**

All of the cells were incubated at 37°C in a humidified 5% CO<sub>2</sub> environment. iPSC (clone code= TkDA3) were kindly provided by K. Eto and H. Nakauchi (Tokyo University). Undifferentiated human iPSC were maintained in mTeSR medium

(Stemcell Technologies) on Matrigel (Corning) coated feeder free plates. HUVEC and MSC were purchased from Lonza and maintained in Endothelial Growth Medium (EGM) or MSC Growth Medium (Lonza). Protocols for endoderm differentiation, hepatic specification, and liver organoid formation were as described previously (Takebe et al., 2014). Briefly, for definitive endoderm differentiation, iPSC were dissociated by Accutase (Stemcell Technologies) and plated onto a Matrigel-coated dish. Medium was replaced with RPMI1640 containing 1% B27 without insulin (Life Technologies), 1 mM sodium butyrate (for the first 3 days), recombinant Wnt3a (R&D: 50 ng ml<sup>-1</sup>) and Activin (R&D: 100 ng ml<sup>-1</sup>) for 5 to 6 days. For hepatic specification, definitive endoderm iPSC (DE-iPSC) were further treated with knockout-DMEM (KO- DMEM) containing 20% knockout serum replacement, 1 mM L-glutamine, 1% nonessential amino acids, 0.1 mM 2-mercaptoethanol (all from Invitrogen), and 1% DMSO (Sigma) for 3 days. Hepatic-specified endoderm iPSC (HE-iPSC) were then dissociated with TrypLE (Gibco) and mixed with dissociated MSC and HUVEC at ratio of 10: 2: 7. The cell mixture was plated on Matrigel bed (50% dilution of the neat Matrigel, solidified at 37°C for 15 minutes) with medium for the liver organoid self-organization culture (LO-medium). The LO-medium consisted of 50% of Hepatocyte Culture Medium (HCM, Lonza) and 50% of Endothelial Growth Medium (EGM, Lonza). HCM was supplemented with HCM BulletKit (Lonza): transferrin, hydrocortisone, BSA–fatty acid free, ascorbic acid, insulin, GA-1000, omitting human epidermal growth factor. EGM was supplemented with EGM BulletKit (Lonza): bovine brain extract, hEGF, hydrocortisone, FBS, GA-1000 and ascorbic acid. After mixing HCM and EGM, 10 ng ml<sup>-1</sup> recombinant hepatocyte growth factor (Sigma), 20 ng ml<sup>-1</sup> recombinant oncostatin M (R&D systems), 100nM dexamethasone (Sigma), and 2.5% of fetal bovine serum (CELLect Gold, MP Biomedicals) were added to complete LO-medium.

### **RNA-seq of liver organoids in hepatic differentiation**

RNA isolation, cDNA synthesis, sequencing on Illumina HiSeq 2000 are described in Supplemental Methods. The RNA-Seq reads were aligned to the human genome (GRCh37/hg19) using TopHat (version 2.0.13). The alignment data from Tophat were fed to an assembler, Cufflinks (version 2.2.1), to assemble aligned RNA-Seq reads into transcripts. Annotated transcripts were obtained from the UCSC genome browser (<http://genome.ucsc.edu>) and the Ensembl database. Transcript

abundances were measured in Fragments Per Kilobase of exon per Million fragments mapped (FPKM). Each condition's FPKM was normalized to median of all samples, which was described as "relative gene expression" in log scale. First, to focus on genes related to the liver, we isolated 3146 significantly over-expressed genes in primary hepatocyte by selecting greater than or equal to 2-fold relative gene expression, by using One-way ANOVA test,  $p < 0.01$  and Benjamini–Hochberg multiple Testing Correction (Table S1 for a full gene list). From the 3146 genes, a gene set of 442 genes was generated by selecting greater than or equal to 2-fold relative gene expression in the day-2 liver organoid. A heat map of the 442 genes in all conditions was described (red=up regulated genes, blue=down regulated genes, Table S2 for a full gene list). Hierarchical clustering analysis of the 442-gene expression profile was generated using GeneSpring 13.0-GX.

### **Liver organoid implantation into mice**

Immunodeficient NOD scid gamma or NSG mice (8-12 weeks old, male; Jackson Laboratories) were kept according to protocols approved by Institutional Animal Care and Use Committee standards at Cincinnati Children's Hospital Medical Center. NSG mice were fed Bactrim Chow (Test Diet). The liver organoids at day-2 of culture were implanted under the kidney capsule, as previously described (Takebe et al., 2013) and described in Supplemental Methods.

### **2-chamber culture**

12- well Transwell® (Corning) with 0.4µm-pore membrane insert were used. The membrane was coated with 7% Matrigel at room temperature for 15min before use. After dissociation with TrypLE at 37°C for 5 minutes, washed  $250 \times 10^3$  HE-iPSC were plated in the upper chamber ( $223 \times 10^3$  cells per  $\text{cm}^2$ );  $250 \times 10^3$  HUVEC, or  $75 \times 10^3$  MSC, or both together were plated in the lower chamber. As a reference, HE-iPSC without cells in the lower chamber were cultured. The cells were cultured with LO-medium in the both chambers, with daily medium exchange. We omitted HGF and OsM from the LO-medium in order to limit extrinsic growth factors.



### **Bile acid uptake assay and transcellular transport assay**

The transcellular transport of bile acids was measured by the translocation of fluorescent labelled bile acid (CGamF, a kind gift from Dr. Hofmann) between the culture chambers as previously described in the 2-chamber Transwell system (Hofmann et al., 2010; Mita et al., 2006; Mita et al., 2005). Briefly, after hepatic differentiation of HE-iPSC in the 2-chamber culture, hepatocyte-like cells on the transwell membrane were pre-incubated with a transport buffer (118 mM NaCl, 23.8 mM NaHCO<sub>3</sub>, 4.83 mM KCl, 0.96 mM KH<sub>2</sub>PO<sub>4</sub>, 1.20 mM MgSO<sub>4</sub>, 12.5 mM HEPES, 5 mM glucose and 1.53 mM CaCl<sub>2</sub>, adjusted to pH 7.4) for 20 minutes. Trans-Epithelial Electrical Resistance (TEER) was measured with EVOM2 probe (WPI). For uptake assay, the cells were incubated with 10 μM of CGamF for 60 minutes and supernatants were washed 3 times with PBS. Then cells were lysed with NaOH and fluorescent intensity of the cell lysates were measure at 490 nm. The fluorescent intensity was normalized by the protein amount in the cells, which were measured by Bradford assay. For basolateral to apical transport assay, 10 μM of CGamF was added to the lower chamber and the transport buffer only to the upper chamber. Sixty minutes later, the transport buffer in the upper chamber was collected and fluorescent intensity was measured at 490 nm. The fluorescent intensity was normalized by the protein amounts of the hepatocyte-like cells. For apical-basolateral transport, CGamF were added into the upper and the fluorescent signals were measured in the lower buffer.

### **Protein analysis by SOMAscan**

The culture supernatants of 2-chamber system were collected after 24 hours' incubation at day-12. Three biological replicates were collected and combined as equal volumes, then submitted to the high-throughput SOMAscan® assay in the laboratories of SOMALogic Inc., (Denver), which quantified proteins as previously described (Hathout et al., 2015; Loffredo et al., 2013; Nahid et al., 2014). In brief, SOMAscan uses aptamer to precisely quantify 1,180 proteins in small fluid aliquots simultaneously, in three different concentrations (5%, 0.3%, 0.01%) to measure proteins within the dynamic range. The assay uses an equilibrium binding in solution of fluorophore-tagged SOMAmers and proteins, with a final capture of the nucleic

acid, which is hybridized to a high-density antisense probe array to generate fluorescent signals that are directly related to the abundance of proteins in the original conditioned media. After signal filtering (signal curating, normalization, fold change, cluster analysis), we obtained heatmap images with cluster analysis with GENE-E software (version 3.0.215, Broad Institute). Of 1,180 proteins tested, 228 proteins in the supernatants of MSC, HUVEC, or MSC+HUVEC were up-regulated three times or higher than that of iPSC only culture supernatant. The proteins in the cluster were analyzed by the Gene Set Enrichment Analysis/Molecular Signature Database (GSEA/MSigDB, Broad Institute). We performed data validation of the assay by testing the albumin concentration using both ELISA and SOMAscan in aliquots from the same culture supernatant (Fig. S9).

### **Statistics**

All *in vitro* experiments were performed in triplicate or more. The numbers of mice or tissues used in each experiment are presented in the text or figure legends. Experimental values are expressed as mean  $\pm$  s.e.m., and statistical significance was determined by 2-tailed Student's t test or by 1-way or 2-way ANOVA for comparison between 3 or more groups, followed by Bonferroni's multiple comparison *post-hoc* test with a significance set at  $p < 0.05$ . Statistical analysis and graphic description were performed by GraphPad Prism (GraphPad Software).

## **Acknowledgements**

We thank Dr. William Balistreri for his advice in manuscript preparation. We also thank Drs. K. Eto, M. Otsu, and H. Nakauchi at Tokyo University for providing iPS cells.

## **Competing interests**

No competing interests declared.

## **Author contributions**

A.A., E.A., C.W., R.M., T.M., P.S., K.P, C.M., M.H., T.T., J.W., J.B.

Conceptualization: A.A., J.W., J.B.; Methodology: A.A., E.A., C.W., P.S., C.M., M.H., T.T., J.W., J.B.; Formal analysis and investigation: A.A., E.A., R.M., T.M., K.P, C.M.;

Data curation: A.A., R.M.; Writing - original draft preparation: A.A, J.B.; Writing - review and editing: A.A., E.A., P.S., K.P, T.T., J.W., J.B.; Funding acquisition: A.A., J.B.; Resources: A.A., E.A., C.M., T.T., J.B.

Supervision: J.W.,J.B.

## **Funding**

This work was supported by the American Association for the Study of Liver Diseases Foundation [Advanced/Transplant Hepatology Fellowship to A.A.] and in part by National Institutes of Health [P30 DK078392 (Bioinformatics Core of the Digestive Disease Research Core Center in Cincinnati)].

## **Data availability**

RNA-Sequencing data may be accessed through NCBI's GEO under accession number GSE85223.

## Reference

- Araki, Y., Katoh, T., Ogawa, A., Bamba, S., Andoh, A., Koyama, S., Fujiyama, Y. and Bamba, T. (2005). Bile acid modulates transepithelial permeability via the generation of reactive oxygen species in the Caco-2 cell line. *Free Radic Biol Med* **39**, 769-780.
- Baxter, M. A., Rowe, C., Alder, J., Harrison, S., Hanley, K. P., Park, B. K., Kitteringham, N. R., Goldring, C. E. and Hanley, N. A. (2010). Generating hepatic cell lineages from pluripotent stem cells for drug toxicity screening. *Stem Cell Res* **5**, 4-22.
- Busso, N., Chesne, C., Delers, F., Morel, F. and Guillouzo, A. (1990). Transforming growth-factor-beta (TGF-beta) inhibits albumin synthesis in normal human hepatocytes and in hepatoma HepG2 cells. *Biochem Biophys Res Commun* **171**, 647-654.
- Butler, S. L., Dong, H., Cardona, D., Jia, M., Zheng, R., Zhu, H., Crawford, J. M. and Liu, C. (2008). The antigen for Hep Par 1 antibody is the urea cycle enzyme carbamoyl phosphate synthetase 1. *Lab Invest* **88**, 78-88.
- Clotman, F., Jacquemin, P., Plumb-Rudewiez, N., Pierreux, C. E., Van der Smissen, P., Dietz, H. C., Courtoy, P. J., Rousseau, G. G. and Lemaigre, F. P. (2005). Control of liver cell fate decision by a gradient of TGF beta signaling modulated by Onecut transcription factors. *Genes Dev* **19**, 1849-1854.
- Clotman, F. and Lemaigre, F. P. (2006). Control of hepatic differentiation by activin/TGFbeta signaling. *Cell Cycle* **5**, 168-171.
- Colman, A. and Dreesen, O. (2009). Pluripotent stem cells and disease modeling. *Cell Stem Cell* **5**, 244-247.
- Deharde, D., Schneider, C., Hiller, T., Fischer, N., Kegel, V., Lubberstedt, M., Freyer, N., Hengstler, J. G., Andersson, T. B., Seehofer, D., et al. (2016). Bile canaliculi formation and biliary transport in 3D sandwich-cultured hepatocytes in dependence of the extracellular matrix composition. *Arch Toxicol* **90**, 2497-2511.
- Ehashi, T., Koyama, T., Ookawa, K., Ohshima, N. and Miyoshi, H. (2007). Effects of oncostatin M on secretion of vascular endothelial growth factor and reconstruction of liver-like structure by fetal liver cells in monolayer and three-dimensional cultures. *J Biomed Mater Res A* **82**, 73-79.
- Forbes, S. J., Gupta, S. and Dhawan, A. (2015). Cell therapy for liver disease: From liver transplantation to cell factory. *J Hepatol* **62**, S157-169.
- Gelly, J. L., Richoux, J. P., Grignon, G., Bouhnik, J., Baussant, T., Alhenc-Gelas, F. and Corvol, P. (1991). Immunocytochemical localization of albumin, transferrin, angiotensinogen and kininogens during the initial stages of the rat liver differentiation. *Histochemistry* **96**, 7-12.
- Ghatak, S., Reveiller, M., Toia, L., Ivanov, A. I., Zhou, Z., Redmond, E. M., Godfrey, T. E. and Peters, J. H. (2015). Bile Salts at Low pH Cause Dilation of Intercellular Spaces in In Vitro Stratified Primary Esophageal Cells, Possibly by Modulating Wnt Signaling. *J Gastrointest Surg*.
- Haridass, D., Narain, N. and Ott, M. (2008). Hepatocyte transplantation: waiting for stem cells. *Curr Opin Organ Transplant* **13**, 627-632.
- Hofmann, A. F., Hagey, L. R. and Krasowski, M. D. (2010). Bile salts of vertebrates: structural variation and possible evolutionary significance. *J Lipid*

Res 51, 226-246.

- Kamiya, A., Kinoshita, T. and Miyajima, A.** (2001). Oncostatin M and hepatocyte growth factor induce hepatic maturation via distinct signaling pathways. *FEBS Lett* **492**, 90-94.
- Kamiya, A., Kojima, N., Kinoshita, T., Sakai, Y. and Miyajima, A.** (2002). Maturation of fetal hepatocytes in vitro by extracellular matrices and oncostatin M: induction of tryptophan oxygenase. *Hepatology* **35**, 1351-1359.
- Mita, S., Suzuki, H., Akita, H., Hayashi, H., Onuki, R., Hofmann, A. F. and Sugiyama, Y.** (2006). Vectorial transport of unconjugated and conjugated bile salts by monolayers of LLC-PK1 cells doubly transfected with human NTCP and BSEP or with rat Ntcp and Bsep. *Am J Physiol Gastrointest Liver Physiol* **290**, G550-556.
- Mita, S., Suzuki, H., Akita, H., Stieger, B., Meier, P. J., Hofmann, A. F. and Sugiyama, Y.** (2005). Vectorial transport of bile salts across MDCK cells expressing both rat Na<sup>+</sup>-taurocholate cotransporting polypeptide and rat bile salt export pump. *Am J Physiol Gastrointest Liver Physiol* **288**, G159-167.
- Noel, G., Le Vee, M., Moreau, A., Stieger, B., Parmentier, Y. and Fardel, O.** (2013). Functional expression and regulation of drug transporters in monolayer- and sandwich-cultured mouse hepatocytes. *Eur J Pharm Sci* **49**, 39-50.
- Schwartz, R. E., Fleming, H. E., Khetani, S. R. and Bhatia, S. N.** (2014). Pluripotent stem cell-derived hepatocyte-like cells. *Biotechnol Adv* **32**, 504-513.
- Shanmukhappa, K., Matte, U., Degen, J. L. and Bezerra, J. A.** (2009). Plasmin-mediated proteolysis is required for hepatocyte growth factor activation during liver repair. *J Biol Chem* **284**, 12917-12923.
- Si-Tayeb, K., Noto, F. K., Nagaoka, M., Li, J., Battle, M. A., Duris, C., North, P. E., Dalton, S. and Duncan, S. A.** (2010). Highly efficient generation of human hepatocyte-like cells from induced pluripotent stem cells. *Hepatology* **51**, 297-305.
- Takayama, K., Morisaki, Y., Kuno, S., Nagamoto, Y., Harada, K., Furukawa, N., Ohtaka, M., Nishimura, K., Imagawa, K., Sakurai, F., et al.** (2014). Prediction of interindividual differences in hepatic functions and drug sensitivity by using human iPSC-derived hepatocytes. *Proc Natl Acad Sci U S A* **111**, 16772-16777.
- Takebe, T., Enomura, M., Yoshizawa, E., Kimura, M., Koike, H., Ueno, Y., Matsuzaki, T., Yamazaki, T., Toyohara, T., Osafune, K., et al.** (2015). Vascularized and Complex Organ Buds from Diverse Tissues via Mesenchymal Cell-Driven Condensation. *Cell Stem Cell* **16**, 556-565.
- Takebe, T., Sekine, K., Enomura, M., Koike, H., Kimura, M., Ogaeri, T., Zhang, R. R., Ueno, Y., Zheng, Y. W., Koike, N., et al.** (2013). Vascularized and functional human liver from an iPSC-derived organ bud transplant. *Nature* **499**, 481-484.
- Takebe, T., Zhang, R. R., Koike, H., Kimura, M., Yoshizawa, E., Enomura, M., Koike, N., Sekine, K. and Taniguchi, H.** (2014). Generation of a vascularized and functional human liver from an iPSC-derived organ bud transplant. *Nat Protoc* **9**, 396-409.
- Tiggelman, A. M., Linthorst, C., Boers, W., Brand, H. S. and Chamuleau, R. A.** (1997). Transforming growth factor-beta-induced collagen synthesis by human liver myofibroblasts is inhibited by alpha2-macroglobulin. *J Hepatol* **26**,

1220-1228.

- Touboul, T., Chen, S., To, C. C., Mora-Castilla, S., Sabatini, K., Tukey, R. H. and Laurent, L. C.** (2016). Stage-specific regulation of the WNT/beta-catenin pathway enhances differentiation of hESCs into hepatocytes. *J Hepatol* **64**, 1315-1326.
- Tsuruya, K., Chikada, H., Ida, K., Anzai, K., Kagawa, T., Inagaki, Y., Mine, T. and Kamiya, A.** (2015). A Paracrine Mechanism Accelerating Expansion of Human Induced Pluripotent Stem Cell-Derived Hepatic Progenitor-Like Cells. *Stem Cells Dev* **24**, 1691-1702.
- Xiao, W., Shinohara, M., Komori, K., Sakai, Y., Matsui, H. and Osada, T.** (2014). The importance of physiological oxygen concentrations in the sandwich cultures of rat hepatocytes on gas-permeable membranes. *Biotechnol Prog* **30**, 1401-1410.
- Yi, F., Liu, G. H. and Izipisua Belmonte, J. C.** (2012). Human induced pluripotent stem cells derived hepatocytes: rising promise for disease modeling, drug development and cell therapy. *Protein Cell* **3**, 246-250.

## Figures

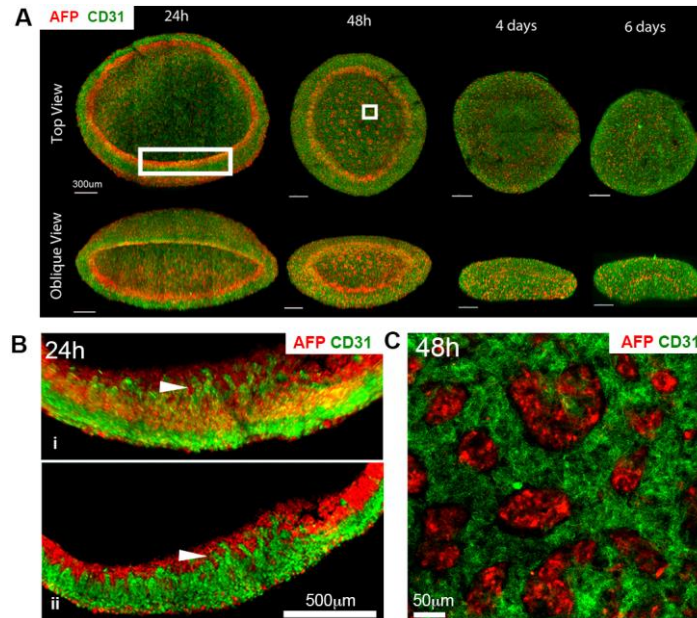

### Fig 1. Liver organoid morphogenesis

(A) Three-dimensional reconstruction image of liver organoid shows positional distribution of AFP+ cells (red) and CD31+ HUVEC (green) in time series (24h, 48h, 4 days, 6 days).

(B) High magnification images of the rectangular inset in (A). Arrowhead points to the interface between differentiating HE-iPSC (red) and HUVEC (green) after 24 hours of culture (i: 3D reconstruction, ii: single z-plane).

(C) High magnification of the small square inset in (A). Clusters of AFP+ (red) cells surrounded by HUVEC (green) at 48 hours of culture.

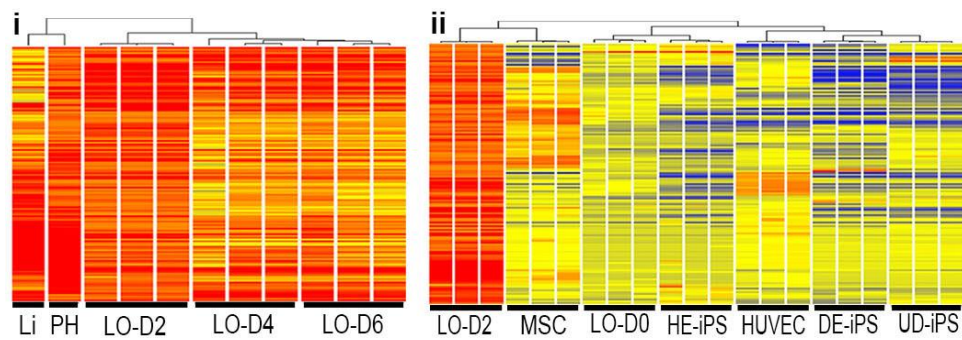

**Fig 2. Liver organoid differentiation in vitro and in vivo**

(i) Cluster analysis of gene expression profiles of liver organoids ( $n=3$ ) at days 2, 4 and 6 of culture (LO-D2, LO-D4, and LO-D6). The expression profile of LO-D2 shows the closest similarity with primary hepatocytes (PH) and liver tissue (Li). (ii) Heatmap shows 442 genes (listed in Tables S1 and S2) sharing the profile with PH and Li (in panel i) and their expression in the remaining experimental conditions of MSC, HUVEC, cell mixture at the time of the plating of iPSC+MSC+HUVEC (liver organoid day-0: LO-D0), hepatic specified endoderm=HE-iPSC, definitive endoderm iPSC (DE-iPSC), and undifferentiated iPSC (UD-iPSC).



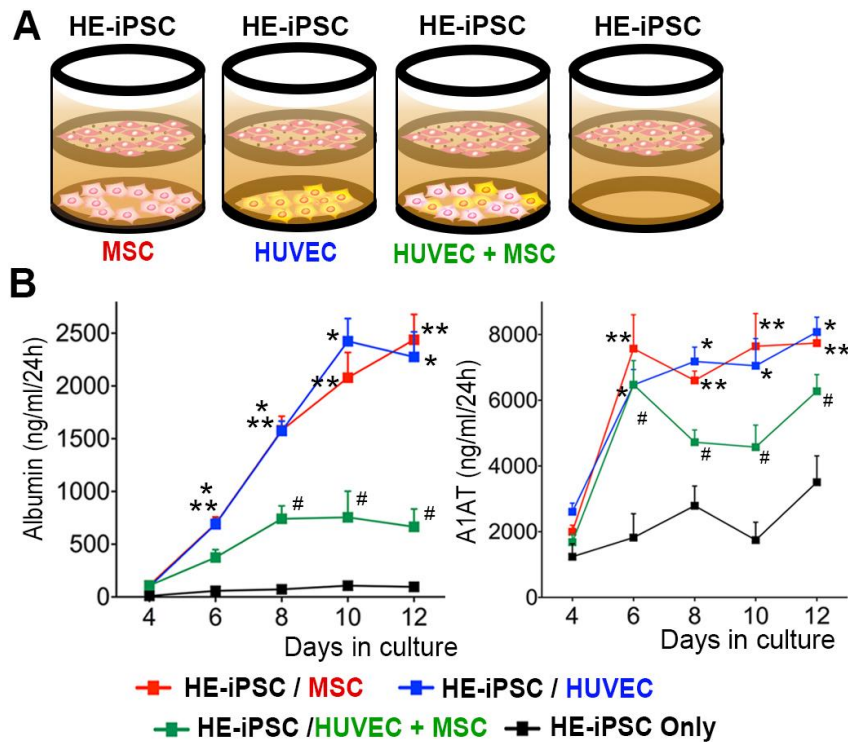

**Fig 3. Hepatic differentiation of HE-iPSC induced by paracrine signals of MSC and/or HUVEC.**

(A) 2-chamber culture system used a Transwell® micro-pore membrane insert to separate the upper chamber from the lower chamber. Hepatic-specified endoderm iPSC (HE-iPSC) were plated in the upper chamber and HUVEC and/or MSC were plated in the lower chamber, while maintaining fluid communication.

(B) Time-course monitoring of Albumin and A1AT production from HE-iPSC in the culture supernatant, quantified by ELISA (n=8). The culture conditions include HE-iPSC plated on the upper chamber and the other cell types in the lower chamber.

Statistical analyses are as follows: \* for HE-iPSC/HUVEC vs. HE-iPSC only  $p < 0.01$ , \*\* for HE-iPSC/MSC vs. HE-iPSC only  $p < 0.01$ , # for HE-iPSC/MSC+HUVEC vs. HE-iPSC only  $p < 0.05$ .

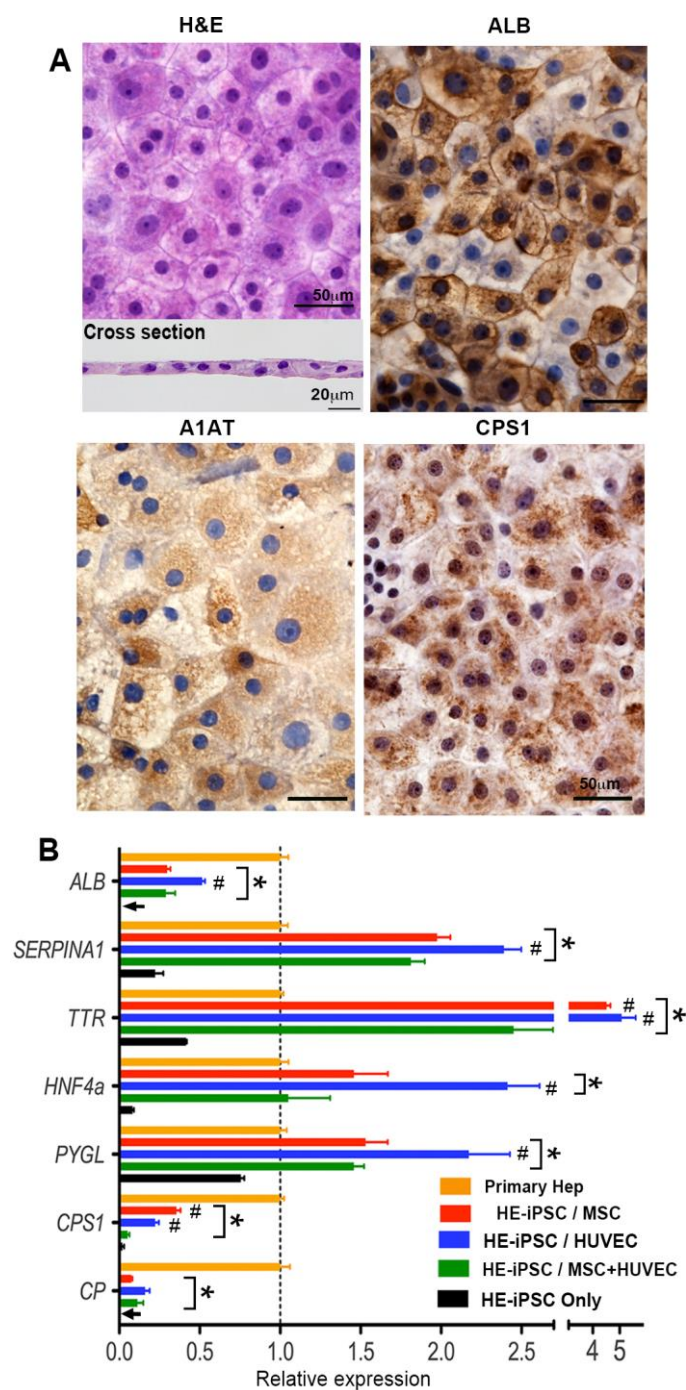

**Fig 4. The expression of hepatic differentiation markers of HE-iPSC induced by paracrine signals.**

(A) Hematoxylin & Eosin staining of fixed HE-iPSC, 8 days after 2-chamber culture with MSC in the lower chamber. Large polygonal cells were found in the monolayer (top), confirmed in the cross section view of the H&E staining (bottom). The remaining panels show an immunohistochemistry staining of hepatic marker proteins

(ALB, A1AT, and CPS1) in the hepatocyte-like cells.

(B) Hepatic marker gene expressions in hepatocyte-like cells at day-8 were measured by quantitative real-time PCR (n=4). After normalized to *GAPDH*, each gene expression level was shown relative to the expression level in primary hepatocytes (Primary Hep). When compared to primary hepatocytes (\*p<0.05), the hepatocyte-like cells in co-cultures expressed more *SERPINA1*, *TTR*, *HNF4a*, and *PYGL*, with lower expression for *ALB*, *CSP1* and *CP*. Comparison among co-culture combinations showed that most genes had higher expression in HE-iPSC/MSC and HE-iPSC/HUVEC when compared to HE-iPSC/MSC+HUVEC (#p<0.05). *GAPDH* expression did not differ among cell types and culture conditions (p>0.05).

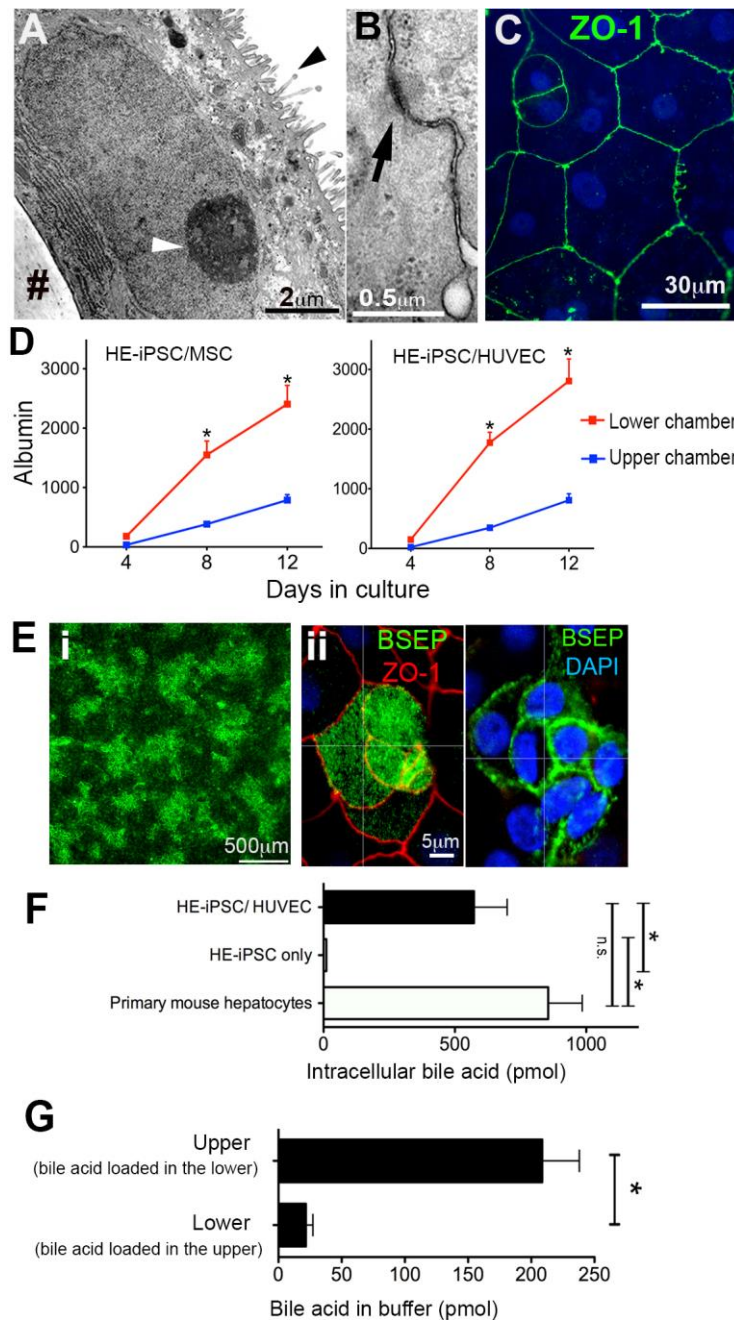

**Fig 5. Functional polarity in hepatocyte-like cells induced by paracrine signals.**

(A) Transmission electron micrograph of hepatocyte-like cells showing microvilli on the apical surface (black arrowhead; white arrowhead points to nucleoli).

(B) Each cell is connected to adjacent cells via a desmosome-like structure (*black arrow*)

(C) Immunofluorescent staining and confocal imaging of the tight junction molecule ZO-1 (green).

(D) Albumin gradient between upper and lower chambers at days 4, 8 and 12 of culture (n=6, \*p<0.001).

(E) (i) Immunofluorescent confocal microscopy imaging at low power magnification of hepatocyte-like cells showing the expression of BSEP (green). (ii) Higher magnification and Z-level analysis showing BSEP (green) and ZO-1 (red) expression.

(F) Bile acid uptake by hepatocyte-like cells after 60 minutes of culture in the 2-chamber system in the presence of fluorescent bile acid (CGamF). Intracellular fluorescent bile acid was measured, normalized to cellular protein and compared with controls. The hepatocyte-like cells showed uptake comparable to that of primary mouse hepatocytes (n=5, \*: p<0.01).

(G) Bile acid transport by hepatocyte-like cells, with CGamF loaded in the lower chamber and buffer only in the upper chamber. After 60 minutes of incubation, CGamF concentration in the upper chamber was measured. In control experiments, CGamF was loaded in the upper chamber and measured in the lower chamber after 60 minutes of incubation.

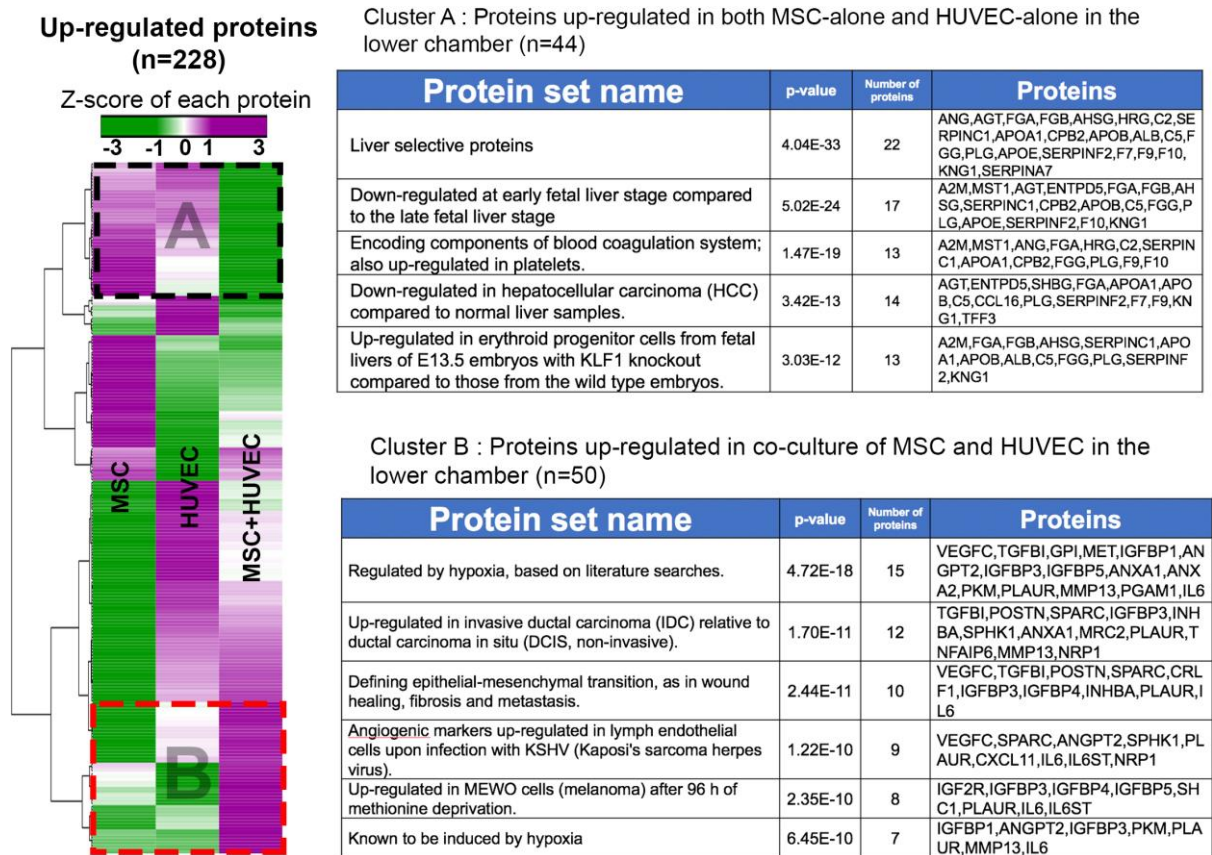

**Fig 6. Protein analysis of the culture supernatants**

At day-12 of culture, the supernatants of the lower chambers from HE-iPSC/MSC, HE-iPSC/HUVEC, HE-iPSC/MSC+HUVEC, and HE-iPSC were harvested and subjected to a SOMAscan assay in three biological replicates. The relative fluorescent unit (RFU) of each cell co-culture combination was normalized to the RFU of HE-iPSC cultured alone. Of 1,180 tested proteins, 228 proteins had at least a 3-fold increase. Cluster analysis using Pearson correlation clustered the proteins in two groups: 1) Cluster A with 44 proteins highly produced by MSC and HUVEC, but down-regulated in co-culture of MSC+HUVEC, and 2) cluster B with 50 proteins highly produced by the co-culture of MSC+HUVEC, but down regulated in MSC and HUVEC. The enrichment analysis by GSEA/MSigDB of each cluster showed that protein sets relate to later liver differentiation in cluster A, and protein sets related to hypoxic responses in the cluster B. Each row represents a protein (expressed as a color scale as depicted).

## Supplemental Materials and Methods

### RNA-seq of liver organoids in hepatic differentiation

Total RNA was isolated from cells using the miRNeasy Kit (Qiagen) according to the manufacturer's protocol. An additional DNase1 digestion step was performed to ensure that the samples were not contaminated with genomic DNA. RNA purity was assessed using the Agilent 2100 Bioanalyzer. Briefly, total RNA (500 ng) was converted to cDNA using the ABI System according to the manufacturer's protocol (High-Capacity cDNA Reverse Transcription Kit). The cDNA was then used for Illumina sequencing library preparation by TruSeq Stranded mRNA and Total RNA Library Prep Kit. DNA fragments were then end-repaired to generate blunt ends with 5' phosphatase and 3' hydroxyls and adapters were ligated for paired end sequencing on Illumina HiSeq 2000. The purified cDNA library products were evaluated using the AATI Fragment Analyzer and diluted to 8-10 pM for cluster generation in situ on the HiSeq paired-end flow cell using the Rapid mode cluster generation system followed by massively-parallel sequencing (2×75 bp) on HiSeq 2000. We obtained 75-bp mate-paired reads from DNA fragments of average length of 150-bp.

### Liver organoid implantation into mice

Immunodeficient NOD scid gamma (NSG) mice (8-12 weeks old, male; Jackson Laboratories) were kept according to protocols approved by Institutional Animal Care and Use Committee standards at Cincinnati Children's Hospital Medical Center. NSG mice were fed Bactrim Chow (Test Diet). The liver organoids at day-2 of culture were implanted under the kidney capsule, as previously described (Takebe et al., 2013). Briefly, mice were anesthetized with 2% inhaled Isoflurane (Butler Schein) and a small incision was made to expose the kidney. A subcapsular pocket was created and 5-7 liver organoids were placed into the pocket. Beginning at 2 weeks after implantation, the mice were briefly anesthetized and a few drops of blood were collected weekly from tail veins. The blood was then spun and the serum was subjected to protein quantification of

human specific albumin and alpha1 antitrypsin (A1AT), measured with ELISA kit (Bethyl Laboratories). At 8 weeks after implantation, the mice were euthanized and liver organoids were excised and examined.

### **Primary mouse hepatocyte isolation**

Mouse primary hepatocytes were isolated from male wild-type by collagenase perfusion through the portal vein. Livers were perfused with Gibco Liver perfusion Media (Invitrogen) followed by Gibco Liver Digestion Media. The liver was excised, minced and strained through a steel mesh sieve. The dispersed hepatocytes were collected by centrifugation at 50g for 2 minutes and washed twice with Williams media (Invitrogen). Hepatocytes were isolated via Percoll separation and washed twice with Williams media. The final pellet was re-suspended with Williams media. Hepatocytes were counted and viability was checked by trypan blue exclusion. Hepatocytes cells were distributed onto Transwell membrane and incubated overnight to allow cell adherence.

### **Measurement of albumin, A1AT and urea**

Unless specified, LO-medium of upper and lower chamber was collected together 24 hours after the last medium exchange. Human albumin and A1AT in the collected culture supernatant were quantified with ELISA kits (Bethyl Laboratories). The protein concentrations were monitored from day-2 to day-12 of culture. Of note, all of the day-2 supernatant contained no albumin nor A1AT. To quantify urea production, cells were incubated with LO-medium containing  $2\text{mmol L}^{-1}$  of  $\text{NH}_4\text{Cl}$  for 48 hours. The supernatant was collected and urea was measured using the QuantiChrom Urea Assay Kit (BioAssay Systems). Because serum in the culture medium contained urea, the serum urea level was subtracted from the amount of urea measured in the media alone.

### **Quantitative PCR**

Total RNA was extracted from cells by the TriAzol method as previously described (Shivakumar et al., 2004). After measuring total RNA concentration,



500ng of RNA were subjected to reverse transcription reactions. The real-time PCR by Brilliant III SYBR Green QPCR Master Mix Gene Expression Assay Kit and the Mx3005p system (Stratagene) quantified mRNA of target genes, with specific primers (Table S3) and quantification protocol as described previously (Bessho et al., 2014). After normalized with a housekeeping gene (*GAPDH*), each gene expression level was described relative to primary hepatocytes or baseline controls.

### **Immunostaining of cultured cells**

Protocols for immunostaining in monolayer cells on the Transwell membrane and formalin fixed paraffin embedded liver organoids were modified from previous reports (Shivakumar et al., 2004). In brief, cells were fixed with 4% paraformaldehyde (or methanol for CPS1 detection) at 4°C for 30 minutes, permeabilized with 0.5% Triton X100, and blocked with 5% donkey serum, then incubated with primary antibodies at 4°C overnight. The liver organoids were sectioned at 5µm and placed on the glass slides. The list of antibodies and dilution factors are described in the Table S4. For immunofluorescent histology, secondary antibodies with fluorescent probes were incubated at room temperature for 1 hour. For immunohistochemistry, we used Vectastain ABC kit (Vector Laboratories) per manufacturer's instruction and DAB (3,3'-Diaminobenzidine) as a chromogen, followed by counter staining of hematoxylin. The monolayer cells remained on the Transwell membrane throughout the process and cover glasses were mounted onto the cell directly with mounting medium. Imaging were performed using an Olympus microscope and DP71 camera (Olympus) or a Zeiss LSM710 confocal microscope.

### **Periodic Acid Schiff staining**

For glycogen detection, differentiated hepatocyte-like cells were fixed using 4% paraformaldehyde in PBS and permeabilized with 0.5% Triton X-100 in PBS. Control cells were incubated with Diastase (1mg/ml in PBS; Sigma). Cells were then incubated with Periodic acid for 5 min, washed with distilled water, and

incubated with freshly prepared Schiff's solution for 15 min. Finally, cells were rinsed and nuclei were stained with Hematoxylin.

### **Whole mount staining of the liver organoids**

At 6 hours, 24 hours, 48 hours, 4 days, and 6 days of co-culturing, liver organoids (n=3 in each group) were fixed in 4% paraformaldehyde at 4°C for 1 hour. The protocol for the whole mount immunostaining of the liver organoids was modified from a previous study (Dipaola et al., 2013). Briefly, specimens were permeabilized in Dent's fixative (80% methanol and 20% dimethyl sulfoxide) for 30 min, followed by rehydration through a series of methanol dilutions. The liver organoid was incubated with 10% normal donkey serum (1 % Triton X in PBS) for 2 hours, and incubated with anti-AFP antibody and anti-CD31 antibody overnight at 4°C. Liver organoids were then incubated in Alexa Fluor 647 donkey anti-rabbit Ab (diluted 1:500) and Alexa Fluor 488 donkey anti-mouse Ab (diluted 1:500) overnight at 4°C. Nuclear staining was performed by incubation with Hoechst 33342 (Invitrogen) at 10 µg ml<sup>-1</sup> for 60 min. The liver organoid was dehydrated in 100% methanol and clarified with Murray's clear (2:1 benzyl benzoate/benzyl alcohol). Imaging was performed using a Zeiss LSM710 confocal microscope. 3D image reconstruction of z-stack confocal images was generated using Imaris Version 7.7 software (Bitplane).

### **Transmission electron microscopy**

The monolayer hepatocyte-like cells on the Transwell membrane were fixed with 2% paraformaldehyde, 2.5% glutaraldehyde and 1% Tannic acid in 0.1 mol L<sup>-1</sup> cacodylate, pH 7.2 for 1 hour at 4°C. Specimens were then post-fixed with 1% OsO<sub>4</sub> for 1 hour, dehydrated in an ethanol series (25, 50, 75, 95, and 100%), and infiltrated with dilutions of ETOH/LX-112 and then embedded in LX-112 (Ladd Research Industries) while still on the culture membrane surface. Blocks were polymerized for 3 days at 60°C. The monolayer was ultra-thin sectioned on Reichert EM UC7 ultra-microtome, perpendicular to the plane of the Transwell membrane and mounted on grids, which were post-stained with uranyl acetate and lead citrate. The sections were viewed using a Hitachi H7650 electron microscope.

## Reference

- Bessho, K., Mourya, R., Shivakumar, P., Walters, S., Magee, J. C., Rao, M., Jegga, A. G. and Bezerra, J. A.** (2014). Gene expression signature for biliary atresia and a role for interleukin-8 in pathogenesis of experimental disease. *Hepatology* **60**, 211-223.
- Dipaola, F., Shivakumar, P., Pfister, J., Walters, S., Sabla, G. and Bezerra, J. A.** (2013). Identification of intramural epithelial networks linked to peribiliary glands that express progenitor cell markers and proliferate after injury in mice. *Hepatology* **58**, 1486-1496.
- Shivakumar, P., Campbell, K. M., Sabla, G. E., Miethke, A., Tiao, G., McNeal, M. M., Ward, R. L. and Bezerra, J. A.** (2004). Obstruction of extrahepatic bile ducts by lymphocytes is regulated by IFN- $\gamma$  in experimental biliary atresia. *Journal of Clinical Investigation* **114**, 322-329.
- Takebe, T., Sekine, K., Enomura, M., Koike, H., Kimura, M., Ogaeri, T., Zhang, R. R., Ueno, Y., Zheng, Y. W., Koike, N., et al.** (2013). Vascularized and functional human liver from an iPSC-derived organ bud transplant. *Nature* **499**, 481-484.

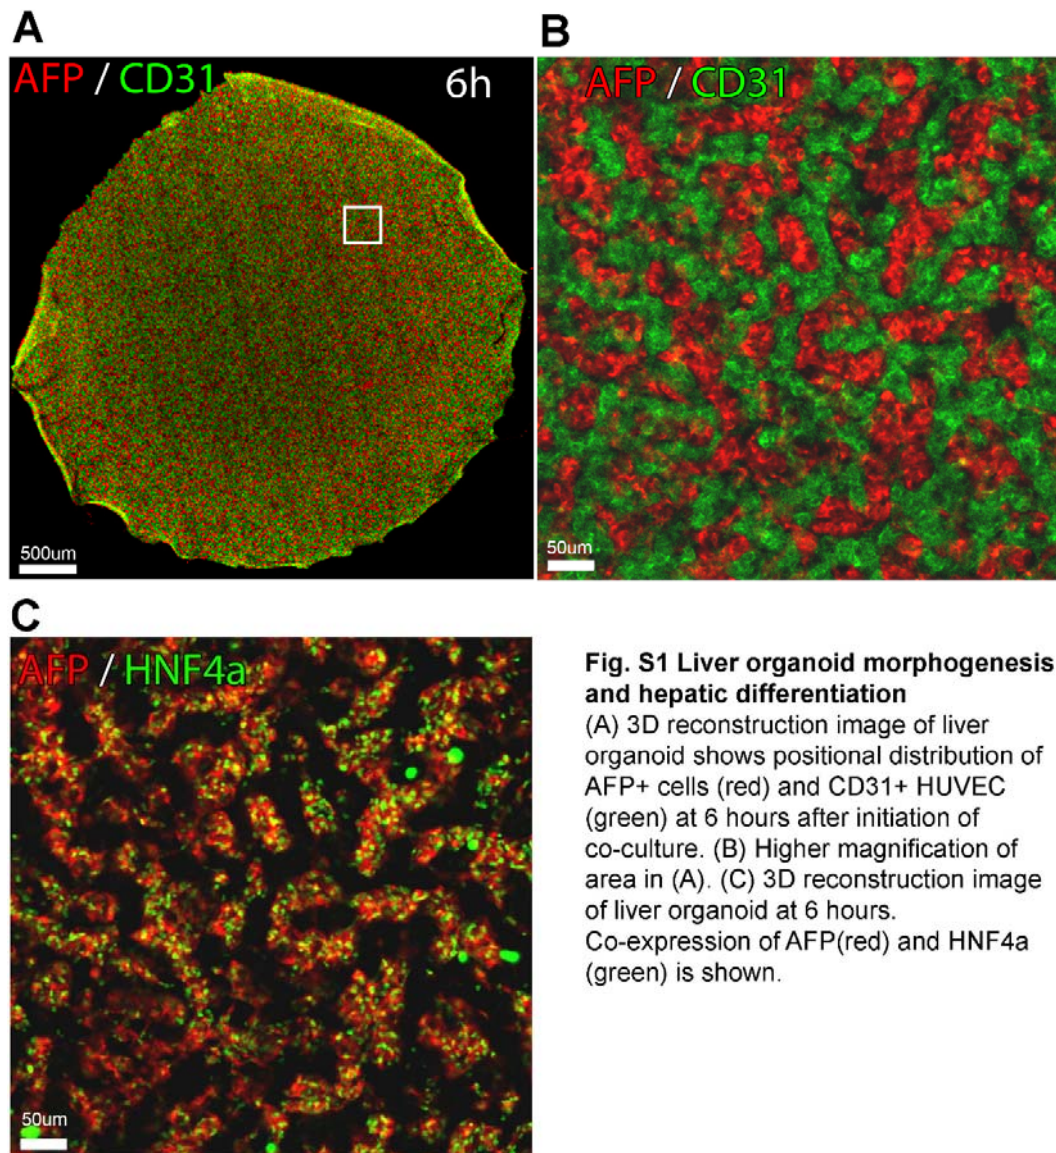

**Fig. S1 Liver organoid morphogenesis and hepatic differentiation**

(A) 3D reconstruction image of liver organoid shows positional distribution of AFP+ cells (red) and CD31+ HUVEC (green) at 6 hours after initiation of co-culture. (B) Higher magnification of area in (A). (C) 3D reconstruction image of liver organoid at 6 hours. Co-expression of AFP (red) and HNF4a (green) is shown.

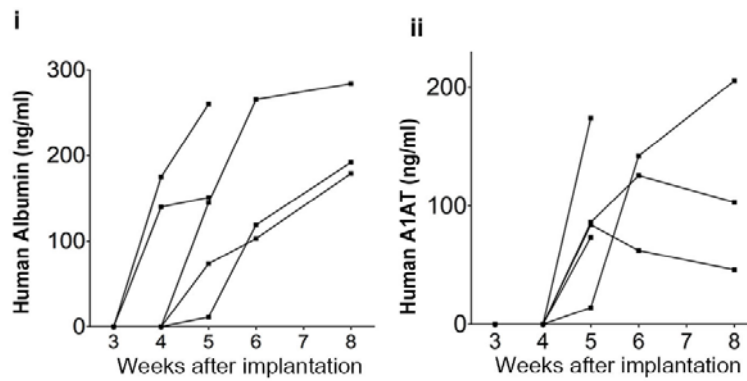

**Fig. S2 Human albumin and alpha1 antitrypsin production by implanted liver organoids in vivo.** Increasing concentrations of human specific albumin (i) and alpha1 antitrypsin (A1AT) (ii) were detected in mouse serum following implantation of the liver organoids into kidney capsules of immunodeficient mice; each line represents one mouse monitored by weekly blood sampling.

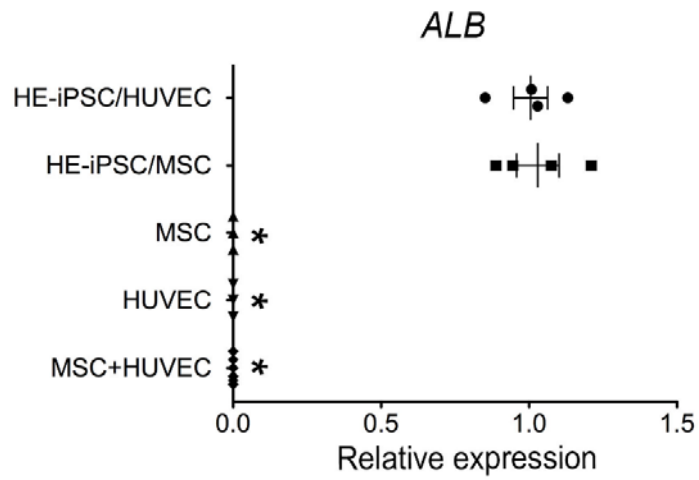

**Fig. S3 The Albumin mRNA expression in the MSC, HUVEC, and MSC+HUVEC**  
The MSC, HUVEC, and MSC+HUVEC, co-cultured with HE-iPSC for 12 days showed no gene expression of *ALB*. (n=3 or more in each group. \*:p<0.01).

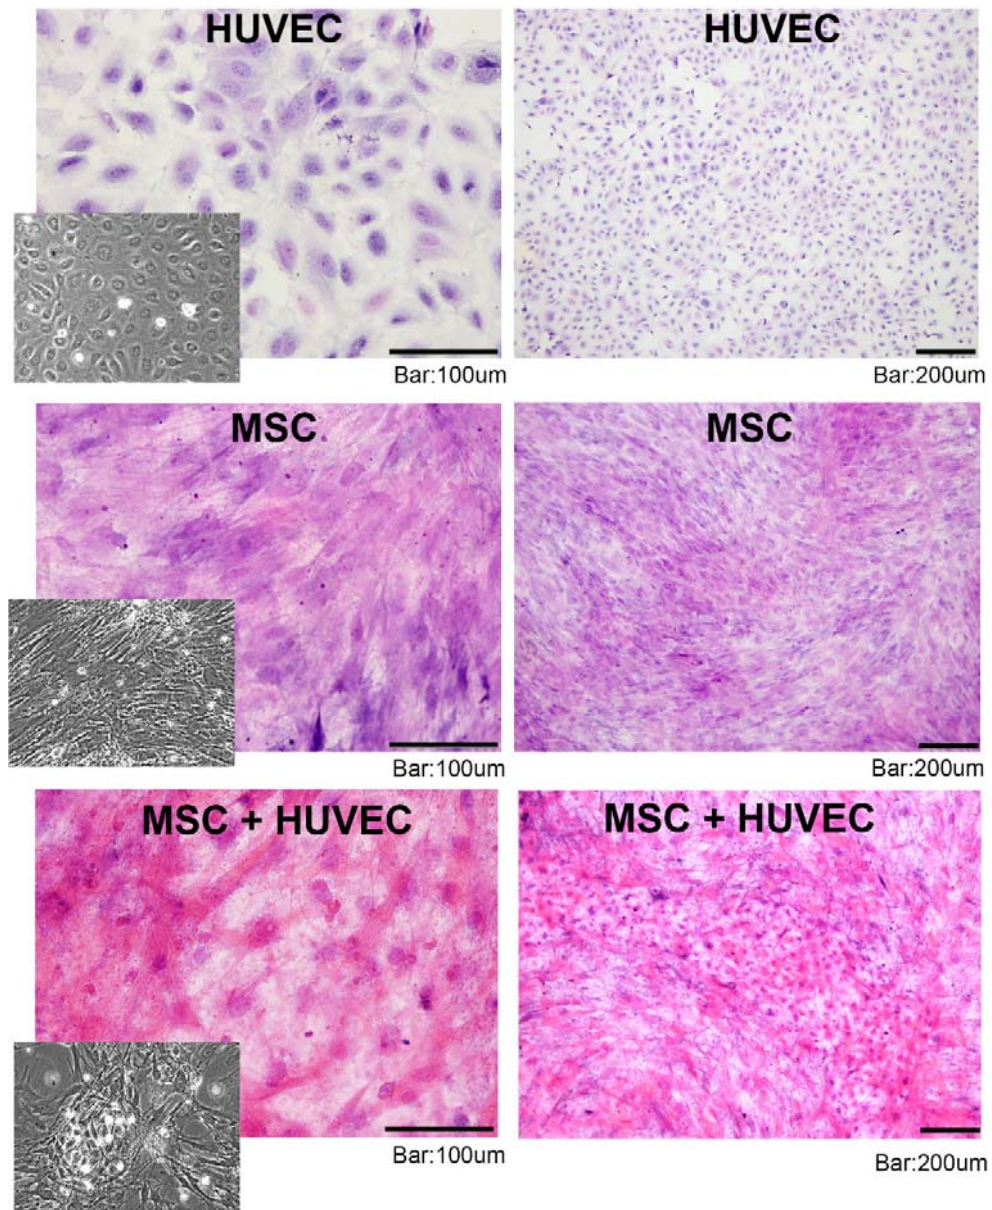

**Fig. S4 Hematoxylin and Eosin staining revealed morphological change of the MSC and HUVEC 4 days after mix-culture in the lower chamber.** The mix-culture of MSC and HUVEC, compared to solo-culture of MSC or HUVEC, formed cell clusters and showed distinct cellular morphology by day-4. Inset images are bright field capture of cells in the culture dish.

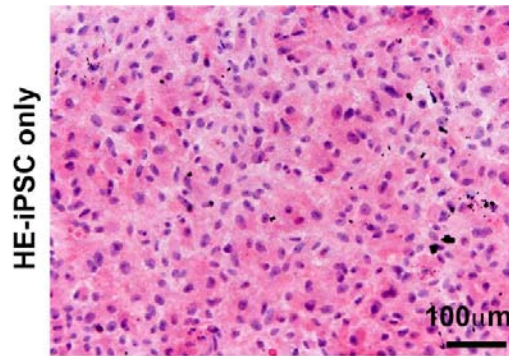

**Fig.S5 Hematoxylin and Eosin staining of cells in the upper chamber and no cells in the lower at day-8.** When cultured without any cells in the lower chamber (iPSC only), HE-iPSCs showed cellular morphology similar to immature endoderm cells.



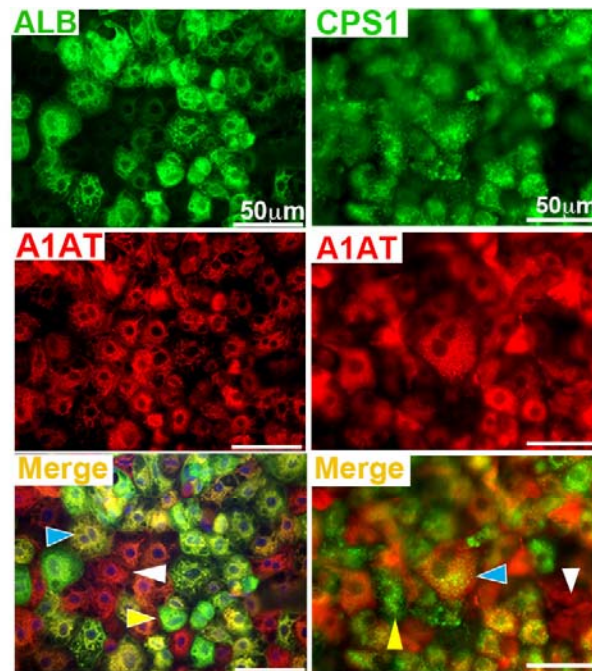

**Fig. S6 The expression pattern of hepatic markers.** The hepatocyte-like monolayer cells showed ALB<sup>+</sup> and A1AT<sup>+</sup> cells with single expression (ALB<sup>+</sup>: yellow arrowhead and A1AT<sup>+</sup>: white arrowhead) and double expression (blue arrowhead). The liver specific marker, CPS1, was also expressed in the hepatocyte-like cells in both single and double expression with A1AT.

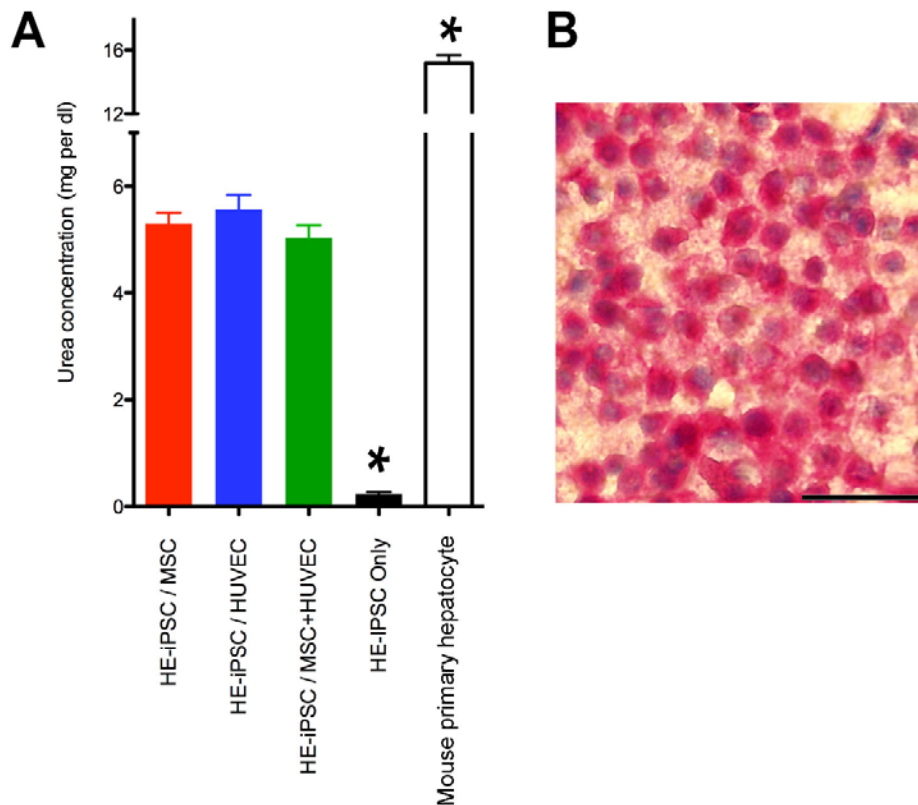

### Fig. S7 Hepatic functions of iPSC-derived monolayer cells in 2-chamber culture

(A) Urea production of the hepatocyte-like cells at day-8. To quantify urea production, cells were incubated with LO-medium containing  $2\text{mmol L}^{-1}$  of  $\text{NH}_4\text{Cl}$  for 48 hours. The supernatant was collected and urea was measured using the QuantiChrom Urea Assay Kit ( $n=4$  of each group). Because serum in the culture medium contained urea, the serum urea level was subtracted from the amount of urea measured in the cultured media alone. HE-iPSC only showed significantly low urea production (\*:  $p<0.05$ ).

(B) Periodic Acid Schiff staining detected glycogen in the cytoplasm of hepatocyte-like cells after 8 days of culture with HUVEC. A similar staining pattern was also seen in cells cultured with MSC and MSC+HUVEC. The nuclei were stained purple with Hematoxylin. (Scale bar =  $50\mu\text{m}$ )

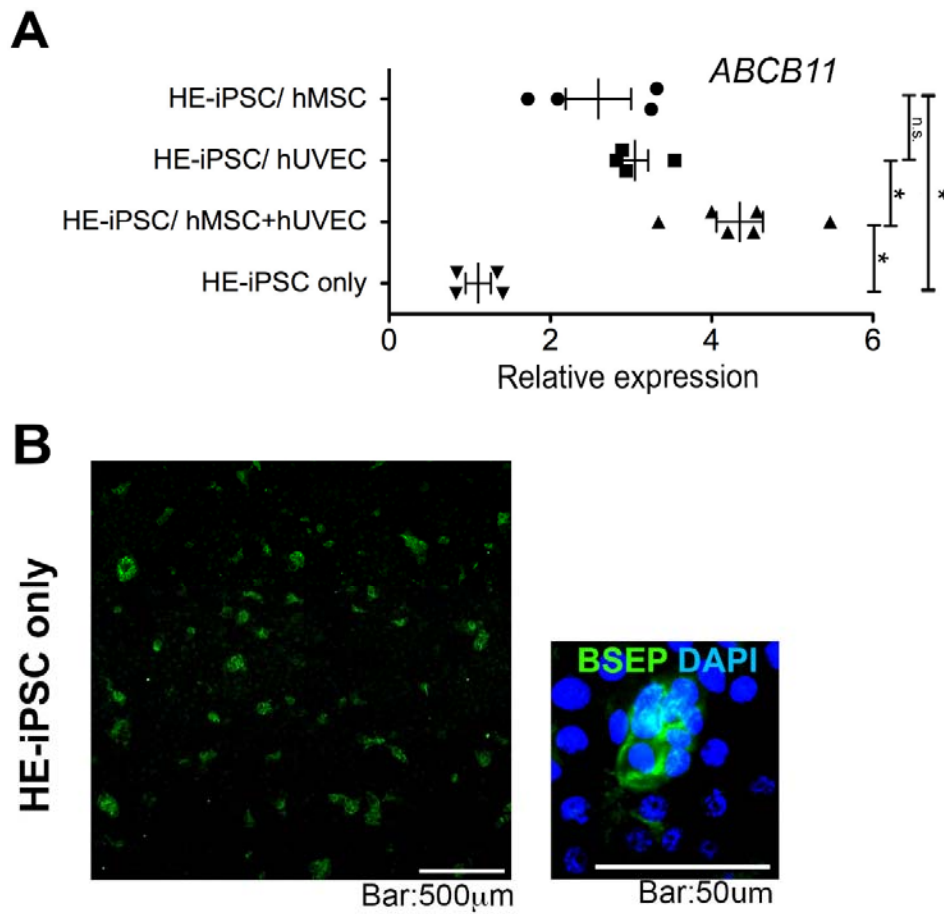

**Fig. S8 BSEP expression in the hepatocyte-like cells**

(A) The hepatocyte-like monolayer cells, co-cultured with MSC, HUVEC and MSC+HUVEC, showed higher gene expression of ABCB11 (encoding BSEP) than cells in HE-iPSC only. (n=4 or more in each group. \*:p<0.05).

(B) BSEP in cells cultured in a condition of HE-iPSC only was visualized by immunofluorescent staining. In a low magnification image (left panel), a few cells expressed BSEP. In a high magnification image (right panel), BSEP is localized on the membrane.

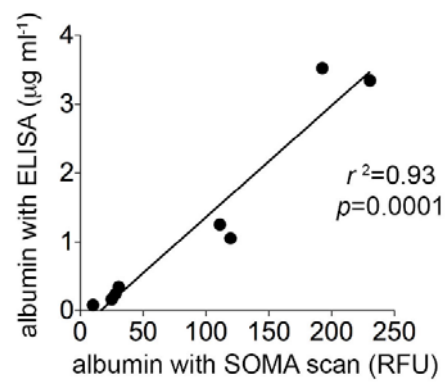

**Fig. S9 Data validation of the SOMAscan results**

An albumin concentration of the same culture supernatant was measured by ELISA and SOMAscan. The results by ELISA are described with  $\mu\text{g ml}^{-1}$  and by SOMAscan with RFU (relative fluorescent unit).

## **Supplemental Table**

Table S1, Gene list of 3146 genes over-expressed in primary hepatocyte

[Click here to Download Table S1](#)

Table S2, Gene list of 442 genes over-expressed in day-2 liver organoid

[Click here to Download Table S2](#)

Table S3, Primer list for RT-PCR

| Gene name | Forward primer          | Reverse primer            |
|-----------|-------------------------|---------------------------|
| GAPDH     | TGACATCAAGAAGGTGGTGAAGC | TCAAAGGTGGAGGAGTGGGTG     |
| ALB       | GGATGAAGGGAAGGCTTCGT    | GAAATCTCTGGCTCAGGCGA      |
| SERPINA1  | GCATAAGGCTGTGCTGACCATC  | TTGTTGAACTTGACCTCGGGG     |
| TTR       | ACCGGTGAATCCAAGTGTC     | AATGGCTCCCAGGTGTCATC      |
| HNF4a     | TGCGACTCTCCAAAACCCCTC   | ATTGCCCATCGTCAACACCT      |
| PYGL      | AATGGGATCACTCCAAGGCG    | AGCTGGCTCAGGTCTTTCAC      |
| CPS1      | GTGGCTTGCTTTGGTGAAGG    | CTTGGCCGGAATGATTGCTG      |
| CP        | TGGTACTTATTCAGCGCCGG    | AGGTTTGCTGTGTCTCTCCG      |
| ABC11     | TGTTGGGATTTTCAGGGGTTG   | CCGTAAACTTGGACACACTCAGACC |

Table S4, Primary and secondary antibodies for immunostaining

| Target protein     | Origin | Manufacturer          | Dilution                                                  |
|--------------------|--------|-----------------------|-----------------------------------------------------------|
| AFP                | Rabbit | DAKO (A0008)          | 1/200                                                     |
| CD31               | Mouse  | Cell Marque (131M-94) | 1/200 (Fluorescent)<br>1/1000 (Immunohistochemistry: IHC) |
| Albumin            | Rabbit | Sigma (A3293)         | 1/1000 (Fluorescent)<br>1/3000 (IHC)                      |
| Alpha1 antitrypsin | Goat   | Gene Tex (GTX77515)   | 1/1000 (Fluorescent)<br>1/3000 ( IHC )                    |
| CPS1               | Rabbit | Abcam (ab45956)       | 1/500 (Fluorescent)<br>1/1500 ( IHC )                     |
| ZO-1               | Mouse  | Thermo (33-9100)      | 1/100                                                     |
| BSEP               | Rabbit | Sigma (HPA019035)     | 1/500 (Fluorescent)<br>1/1500 ( IHC )                     |

### Secondary antibody list

|                                    | Manufacturer             |
|------------------------------------|--------------------------|
| Alexa Fluor 647 Goat anti-Rabbit   | Thermo/Life Technologies |
| Alexa Fluor 488 Donkey anti-Rabbit | Jackson Immunoresearch   |
| Alexa Fluor 594 Donkey anti-Goat   | Jackson Immunoresearch   |
| Alexa Fluor 488 Goat anti-Mouse    | Jackson Immunoresearch   |
| Alexa Fluor 647 Goat anti-Mouse    | Thermo/Life Technologies |

Table S5, Full result of SOMAscan protein analysis of culture supernatant

[Click here to Download Table S5](#)

Table S6, List of over-expressed proteins (3 or higher than HE-iPSC only culture condition) in HE-iPSC/MSC or HE-iPSC/HUVEC or HE-iPSC/MSC+HUVEC

|         |             |          |        |           |
|---------|-------------|----------|--------|-----------|
| A2M     | CFI         | GPNMB    | NAAA   | SFTPD     |
| ACP5    | CFP         | GZMA     | NAGK   | SHBG      |
| ADAM12  | CGA CGB     | H2AFZ    | NAMPT  | SHC1      |
| ADSL    | CHRD1       | HGF      | NAPA   | SHH       |
| AGT     | CHST6       | HIST1H1C | NID1   | SLPI      |
| AHSG    | CLEC11A     | HNRNPAB  | NID2   | SNRPF     |
| AK1     | CLEC11A     | HRG      | NME1   | SPARC     |
| AKR7A2  | CLU         | IDUA     | NRP1   | SPHK1     |
| ALB     | CPB2        | IGF2R    | NTN4   | SPOCK1    |
| ANG     | CRK         | IGFBP1   | NXPH1  | SSRP1     |
| ANGPT1  | CRLF1 CLCF1 | IGFBP3   | OMD    | STC1      |
| ANGPT2  | CSF1        | IGFBP4   | PA2G4  | STIP1     |
| ANGPTL4 | CSK         | IGFBP5   | PARK7  | SYNCRIP   |
| ANP32B  | CTGF        | IGFBP6   | PCSK9  | TFF3      |
| ANXA1   | CTSD        | IL12RB2  | PDGFB  | TGFBI     |
| ANXA2   | CXCL1       | IL18R1   | PDGFC  | TGFBR3    |
| APOA1   | CXCL11      | IL1R1    | PDIA3  | THBS2     |
| APOB    | CXCL12      | IL1RL1   | PF4    | TIE1      |
| APOE    | CXCL6       | IL25     | PGAM1  | TNFAIP6   |
| BGN     | DCN         | IL6      | PGD    | TNFRSF12A |
| BMP6    | DDR1        | IL6R     | PGF    | TNFRSF13C |
| BMP7    | DIABLO      | IL6ST    | PI3    | TNFRSF1B  |
| BMPER   | DYNLRB1     | INHBA    | PKM2   | TNFSF15   |
| BOC     | ECE1        | ITIH4    | PLAT   | UBE2I     |
| C1R     | EIF5A       | KIR2DL4  | PLAUR  | UFC1      |
| C2      | ENTPD5      | KLK7     | PLCG1  | UNC5C     |
| C3      | EPB41       | KNG1     | PLG    | VEGFA     |
| C3      | EPO         | KPNA2    | PLG    | VEGFA     |
| C3      | ESAM        | KPNB1    | POSTN  | VEGFC     |
| C4A C4B | ESM1        | LBP      | PTPN11 | VTA1      |



|         |             |          |          |         |
|---------|-------------|----------|----------|---------|
| C4A C4B | F10         | LEPR     | RAC1     | VWF     |
| C5      | F10         | LGALS3BP | RAN      | WFIKKN1 |
| C5      | F5          | LYZ      | RBM39    | XPNPEP1 |
| C5 C6   | F7          | MAP2K4   | RGMB     | XRCC6   |
| C6      | F9          | MAPK1    | RPS3     |         |
| CAMK2B  | FETUB       | MAPK12   | RPS7     |         |
| CCDC80  | FGA FGB FGG | MAPK3    | SAA1     |         |
| CCL13   | FGA FGB FGG | MET      | SBDS     |         |
| CCL14   | FGF7        | METAP2   | SCARF1   |         |
| CCL15   | FGF9        | MFGE8    | SELL     |         |
| CCL16   | FGG         | METAP2   | SELP     |         |
| CCL20   | FLT4        | MFGE8    | SERPINA6 |         |
| CCL23   | FRZB        | MICB     | SERPINA7 |         |
| CCL23   | FYN         | MMP1     | SERPINC1 |         |
| CCL7    | GAPDH       | MMP10    | SERPINE1 |         |
| CD55    | GDF5        | MMP13    | SERPINE2 |         |
| CFB     | GFRA1       | MMP2     | SERPINF2 |         |
| CFC1    | GNS         | MRC2     | SET      |         |
| CFH     | GPI         | MST1     | SFRP1    |         |

Table S7, Lists of all proteins in cluster A and B in figure 6

| Cluster A (44 proteins) | Cluster B (50 proteins) |
|-------------------------|-------------------------|
| A2M                     | ANGPT2                  |
| AGT                     | ANP32B                  |
| AHSG                    | ANXA1                   |
| ALB                     | ANXA2                   |
| ANG                     | CCL23                   |
| APOA1                   | CCL23                   |
| APOB                    | CHST6                   |
| APOE                    | CRK                     |
| C2                      | CRLF1 CLCF1             |
| C5                      | CXCL11                  |
| C5                      | DIABLO                  |
| C5 C6                   | DYNLRB1                 |
| C6                      | EIF5A                   |
| CAMK2B                  | GPI                     |
| CCL15                   | IGF2R                   |
| CCL16                   | IGFBP1                  |
| CCL7                    | IGFBP3                  |
| CPB2                    | IGFBP4                  |
| ENTPD5                  | IGFBP5                  |
| EPO                     | IL6                     |
| F10                     | IL6ST                   |
| F10                     | INHBA                   |
| F7                      | KIR2DL4                 |
| F9                      | LEPR                    |
| FETUB                   | MAP2K4                  |
| FGA FGB FGG             | MET                     |
| FGA FGB FGG             | MMP13                   |
| FGG                     | MRC2                    |
| HRG                     | NAPA                    |
| IL25                    | NRP1                    |
| IL6R                    | PARK7                   |
| KLK7                    | PDGFC                   |
| KNG1                    | PDIA3                   |
| MST1                    | PGAM1                   |
| PCSK9                   | PGD                     |
| PI3                     | PKM2                    |
| PLG                     | PLAUR                   |
| PLG                     | POSTN                   |
| SERPINA7                | PTPN11                  |
| SERPINC1                | RGMB                    |
| SERPINF2                | SBDS                    |
| SHBG                    | SHC1                    |
| SLPI                    | SPARC                   |
| TFF3                    | SPHK1                   |
|                         | TGFBI                   |
|                         | TNFAIP6                 |
|                         | TNFRSF13C               |
|                         | UFC1                    |
|                         | VEGFC                   |
|                         | VTA1                    |

Table S8, Lists of enrichment analysis of each cluster in figure 6

[Click here to Download Table S8](#)
